# Supplementary material for: Quaternary Ru(ii) complexes of terpyridines, saccharin and 1,2-azoles: effect of substituents on molecular structure, speciation, photoactivity, and photocytotoxicity
Source: Royal Society of Chemistry journal article supplement (doi:10.1039/d2dt02203f), 2022-01-01
Supplement: d2dt02203f1.pdf [file d2dt02203f1.pdf]

## Supporting Information (SI)

### Quaternary Ru(II) Complexes of Terpyridines, Saccharin and 1, 2-Azoles: Effect of Substituents on Molecular Structure, Speciation, Photoactivity, and Cytotoxicity

Priyaranjan Kumar<sup>a</sup>, Prerana Singh<sup>bc</sup>, Sanjoy Saren<sup>a</sup>, Juhi Sayala<sup>a</sup>, Sri Sivakumar<sup>b</sup>, Ashis K.  
Patra<sup>\*a</sup>

---

Author address: <sup>a</sup>Department of Chemistry, Indian Institute of Technology Kanpur, Kanpur 208016, Uttar Pradesh, India. E-mail: [akpatra@iitk.ac.in](mailto:akpatra@iitk.ac.in)

<sup>b</sup>Department of Chemical Engineering, DST Thematic Unit of Excellence on Soft Nanofabrication, Indian Institute of Technology Kanpur, Kanpur 208016, Uttar Pradesh, India.

<sup>c</sup>Department of Biological Sciences & Bioengineering, Indian Institute of Technology Kanpur, Uttar Pradesh 208016, India

## Contents

| Serial no.         |                                                                                    | Page      |
|--------------------|------------------------------------------------------------------------------------|-----------|
|                    | <b>Spectroscopy and characterizations</b>                                          |           |
| <b>Figure S1.</b>  | FTIR of complexes <b>1-6</b>                                                       | <b>4</b>  |
| <b>Figure S2.</b>  | ESI-MS of complexes <b>2, 3, 5</b> and <b>6</b>                                    | <b>5</b>  |
| <b>Figure S3.</b>  | ESI-MS of complexes <b>1</b> and <b>4</b>                                          | <b>5</b>  |
| <b>Figure S4.</b>  | <sup>1</sup> H NMR of complex <b>1</b>                                             | <b>6</b>  |
| <b>Figure S5.</b>  | <sup>1</sup> H NMR of complex <b>2</b>                                             | <b>6</b>  |
| <b>Figure S6.</b>  | <sup>1</sup> H NMR of complex <b>3</b>                                             | <b>7</b>  |
| <b>Figure S7.</b>  | <sup>1</sup> H NMR of complex <b>4</b>                                             | <b>7</b>  |
| <b>Figure S8.</b>  | <sup>1</sup> H NMR of complex <b>5</b>                                             | <b>8</b>  |
| <b>Figure S9.</b>  | <sup>1</sup> H NMR of complex <b>6</b>                                             | <b>8</b>  |
| <b>Figure S10.</b> | UV-Vis spectra and cyclic voltammetry of the complexes <b>1-6</b>                  | <b>9</b>  |
| <b>Figure S11.</b> | Fluorescence spectra of the complexes <b>1-6</b>                                   | <b>9</b>  |
|                    | <b>X-ray diffractions studies</b>                                                  |           |
| <b>Table S1.</b>   | Crystallographic refinement parameters of the complexes <b>1-3</b>                 | <b>10</b> |
| <b>Table S2.</b>   | Crystallographic refinement parameters of the complexes <b>4-6</b>                 | <b>11</b> |
| <b>Figure S12.</b> | Unit cell diagram of complexes <b>1-6</b>                                          | <b>12</b> |
| <b>Figure S13.</b> | Dihedral angle between R-tpy and 1,2 azoles for the complexes <b>1-6</b>           | <b>13</b> |
| <b>Figure S14.</b> | Dihedral angle between two saccharins of complexes <b>1-6</b>                      | <b>14</b> |
| <b>Table S3.</b>   | Selected bond lengths and bond angle parameters for <b>1</b> and <b>2</b>          | <b>15</b> |
| <b>Table S4.</b>   | Selected bond lengths and bond angle parameters for <b>3</b> and <b>4</b>          | <b>16</b> |
| <b>Table S5.</b>   | Selected bond lengths and bond angle parameters for <b>5</b> and <b>6</b>          | <b>17</b> |
|                    | <b>Solvolysis</b>                                                                  |           |
| <b>Figure S15.</b> | Solvolysis of the complexes <b>1-3</b> in DMF and buffer                           | <b>18</b> |
| <b>Figure S16.</b> | Solvolysis of the complexes <b>4-6</b> in DMF and buffer                           | <b>19</b> |
|                    | <b>Photostability and photoactivity</b>                                            |           |
| <b>Figure S17.</b> | White light stability of the complexes <b>1-6</b>                                  | <b>20</b> |
| <b>Figure S18.</b> | Green light activity of the complexes <b>2</b> and <b>4-6</b> from UV-Vis studies  | <b>21</b> |
| <b>Figure S19.</b> | Green light activity of the complexes <b>1, 3</b> and <b>4-6</b> from fluorescence | <b>22</b> |
| <b>Figure S20.</b> | Fluorescence measurement for stability of the complexes <b>1-6</b> in dark         | <b>23</b> |
| <b>Figure S21.</b> | An overlay emission intensity of the complexes <b>1-6</b> in dark                  | <b>24</b> |
|                    | <b>Biological studies</b>                                                          |           |
| <b>Figure S22.</b> | CT-DNA binding of the complexes <b>1, 3,</b> and <b>4-6</b>                        | <b>25</b> |
| <b>Figure S23.</b> | Ethidium bromide displacement assay of the complexes <b>1-4</b> and <b>6</b>       | <b>26</b> |
| <b>Figure S24.</b> | Bovine serum albumin (BSA) binding of the complexes <b>2-6</b>                     | <b>27</b> |
| <b>Figure S25.</b> | Absorption spectra of BSA upon addition of complexes <b>1-6</b>                    | <b>28</b> |
| <b>Figure S26.</b> | Synchronous fluorescence spectra of the BSA binding for <b>1-3</b>                 | <b>29</b> |
| <b>Figure S27.</b> | Synchronous fluorescence spectra of the BSA binding for <b>4</b> and <b>5</b>      | <b>30</b> |
| <b>Figure S28.</b> | DPBF assay depicting singlet oxygen generation for complexes <b>1-3</b>            | <b>31</b> |
| <b>Figure S29.</b> | DPBF assay depicting singlet oxygen generation for complexes <b>4</b> and <b>5</b> | <b>32</b> |

|                    |                                                                                               |           |
|--------------------|-----------------------------------------------------------------------------------------------|-----------|
| <b>Figure S30.</b> | MTT assay for complexes <b>2, 3, 4,</b> and <b>5</b> in HeLa cells                            | <b>33</b> |
| <b>Figure S31.</b> | MTT assay for complexes <b>2, 3, 4,</b> and <b>5</b> in MCF7 cells                            | <b>33</b> |
| <b>Figure S32.</b> | Dark and photocytotoxicity comparison of complexes <b>1, 2, 4,</b> and <b>5</b> in HeLa cells | <b>34</b> |
| <b>Figure S33.</b> | Dark and photocytotoxicity comparison of complexes <b>2, 3, 4,</b> and <b>5</b> in MCF7 cells | <b>34</b> |
| <b>Figure S34.</b> | Cellular uptake of complexes <b>3, 4,</b> and <b>5</b> in MCF7 cells                          | <b>35</b> |
| <b>Figure S35.</b> | Cellular uptake of complexes in MCF7 cells in cyan pseudo color                               | <b>36</b> |
| <b>Figure S36.</b> | Cellular uptake of complexes <b>1, 2,</b> and <b>3</b> in HeLa cells                          | <b>37</b> |
| <b>Figure S37.</b> | Cellular uptake of complexes <b>4, 5,</b> and <b>6</b> in HeLa cells                          | <b>38</b> |
| <b>Figure S38.</b> | Apoptosis of MCF7 cells with complexes <b>1</b> and <b>6</b>                                  | <b>39</b> |

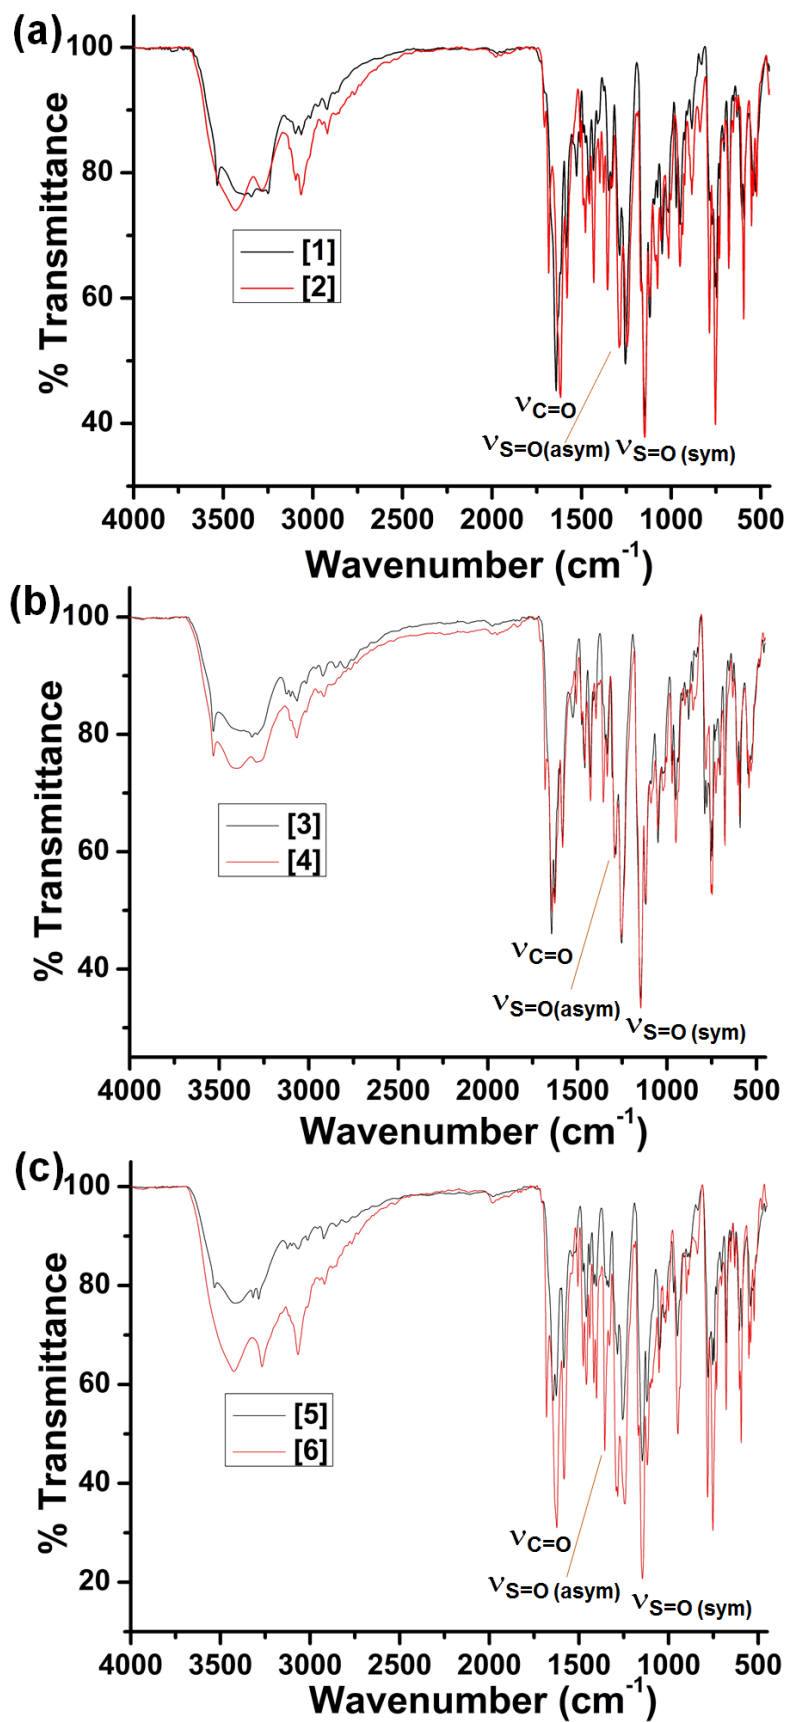

**Fig. S1.** Overlay of solid-state FTIR spectra (in KBr Pellets) of the complexes (a) **1** and **2**; (b) **3** and **4** and (c) **5** and **6**.

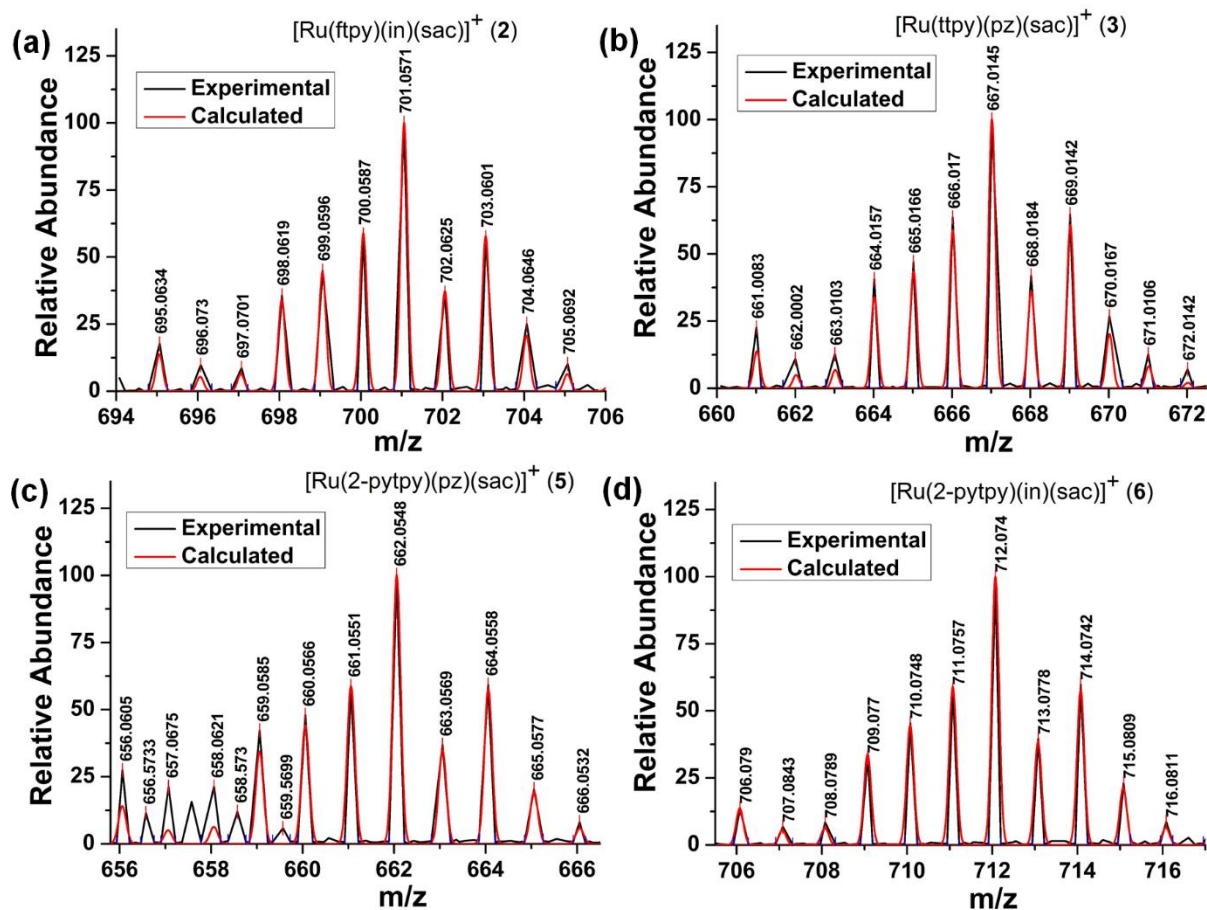

**Fig. S2.** ESI-MS spectra of the complexes in methanol. An overlay of calculated (red) and experimental (black) isotopic distribution pattern of complexes (a) **2**; (b) **3**; (c) **5** and (d) **6**.

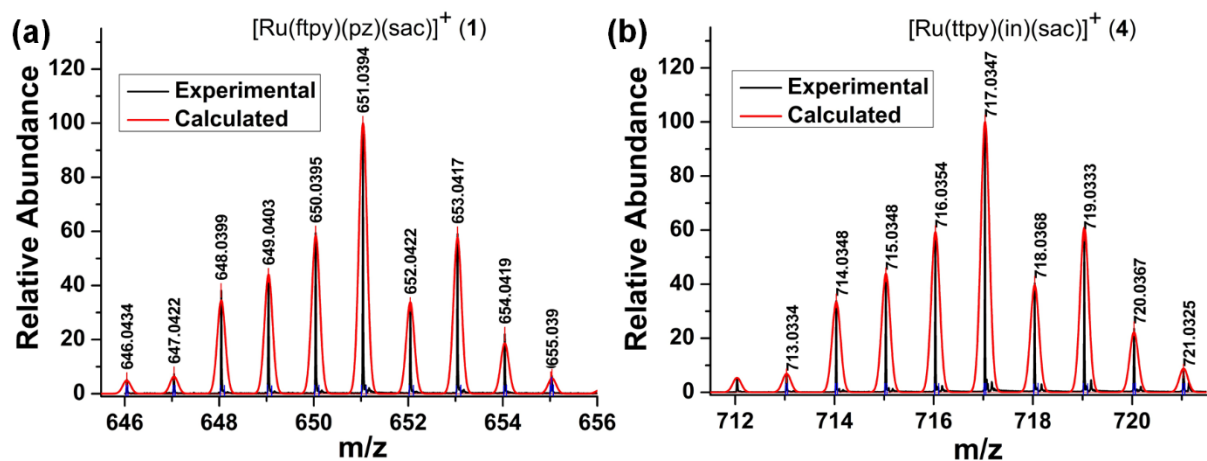

**Fig. S3.** ESI-MS spectra of the complexes in methanol. An overlay of calculated (red) and experimental (black) isotopic distribution pattern of complexes (a) **1** and (b) **4**.

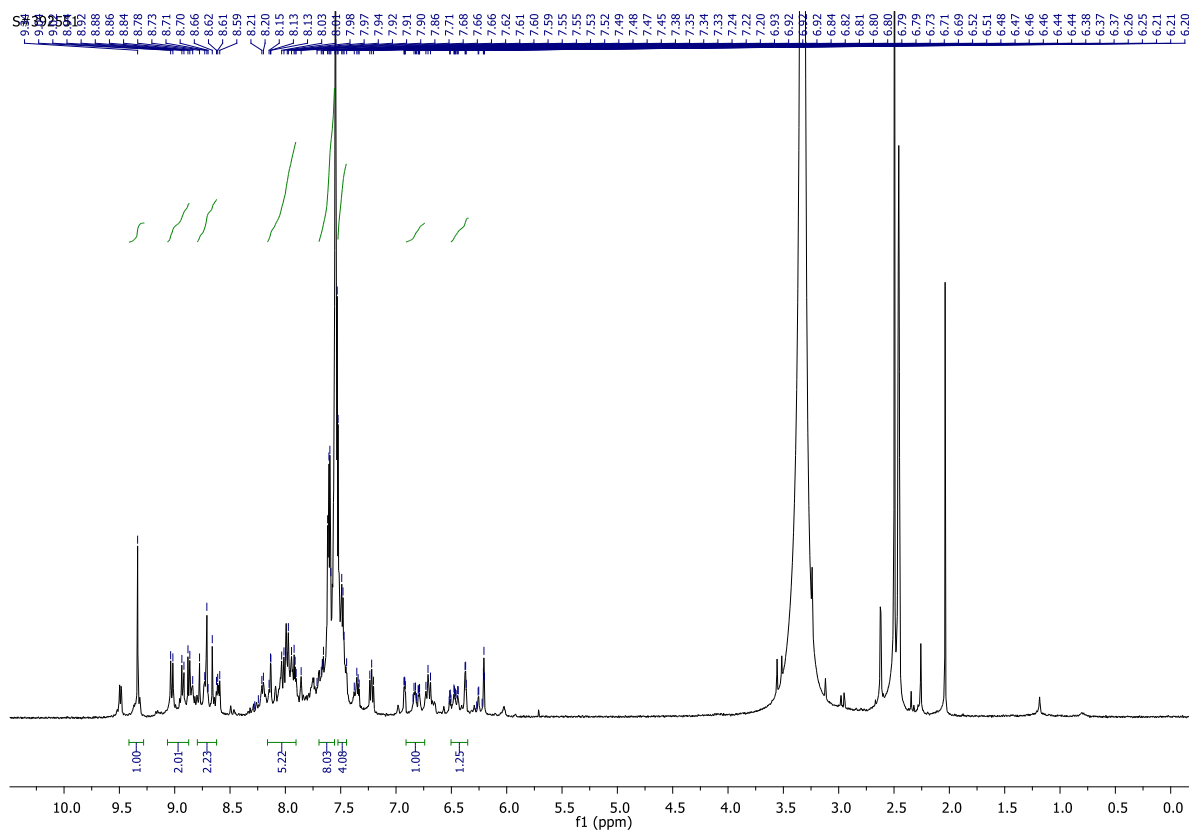

**Fig. S4.**  $^1\text{H-NMR}$  (400 MHz,  $\text{DMSO-}d_6$ ) spectra of complex **1** at 298 K.

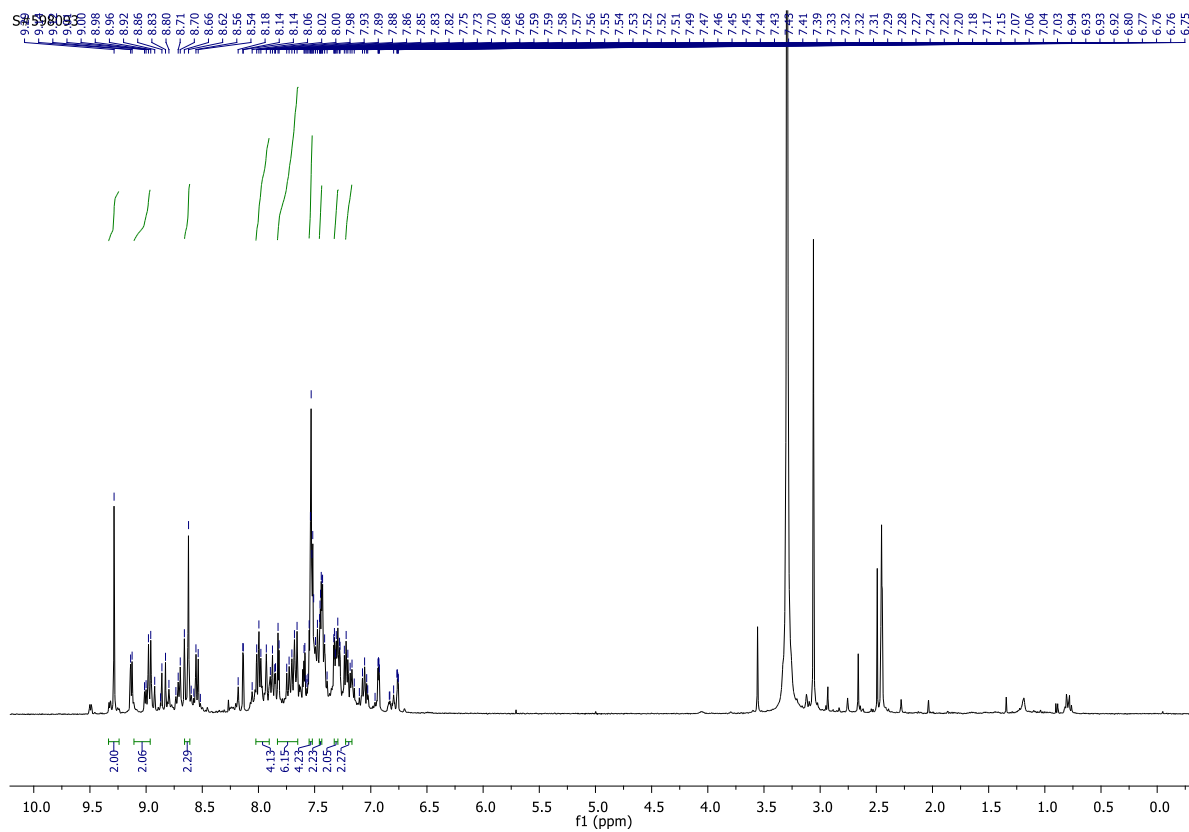

**Fig. S5.**  $^1\text{H-NMR}$  (400 MHz,  $\text{DMSO-}d_6$ ) spectra of complex **2** at 298 K.

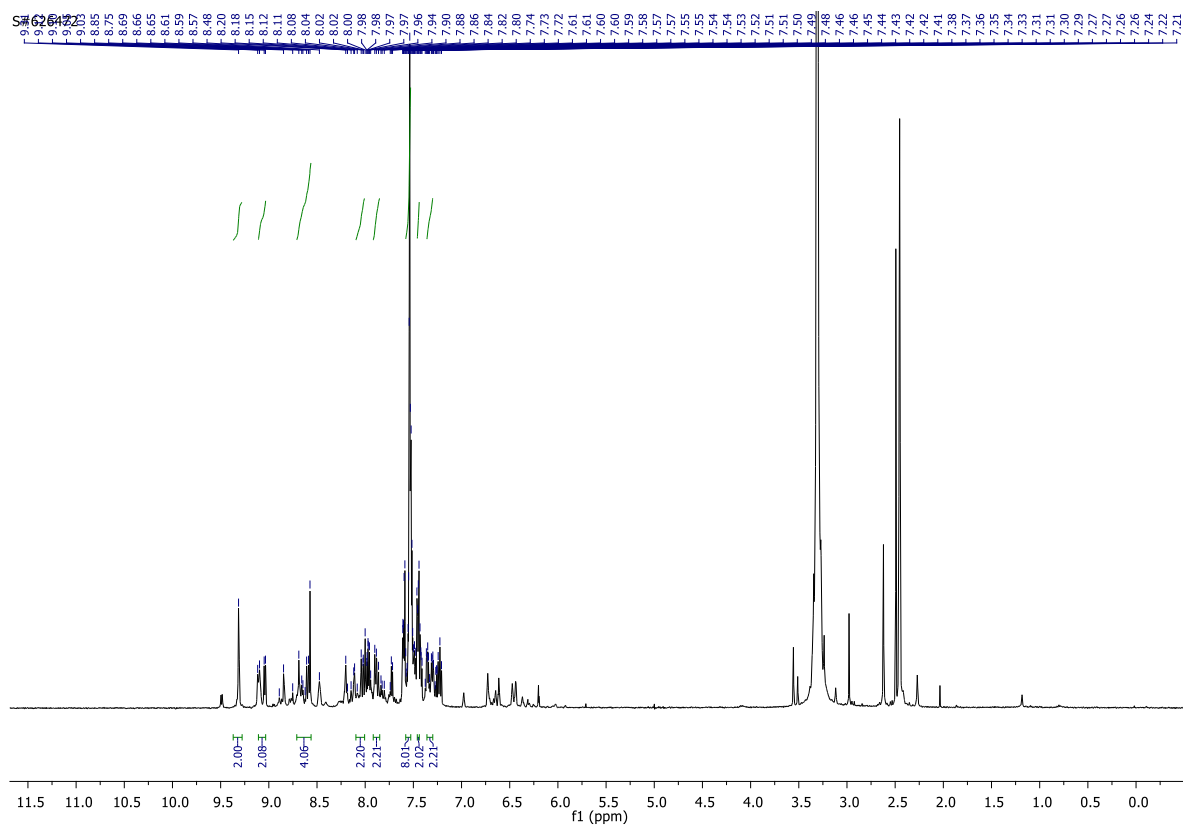

**Fig. S6.**  $^1\text{H-NMR}$  (400 MHz,  $\text{DMSO-}d_6$ ) spectra of complex **3** at 298 K.

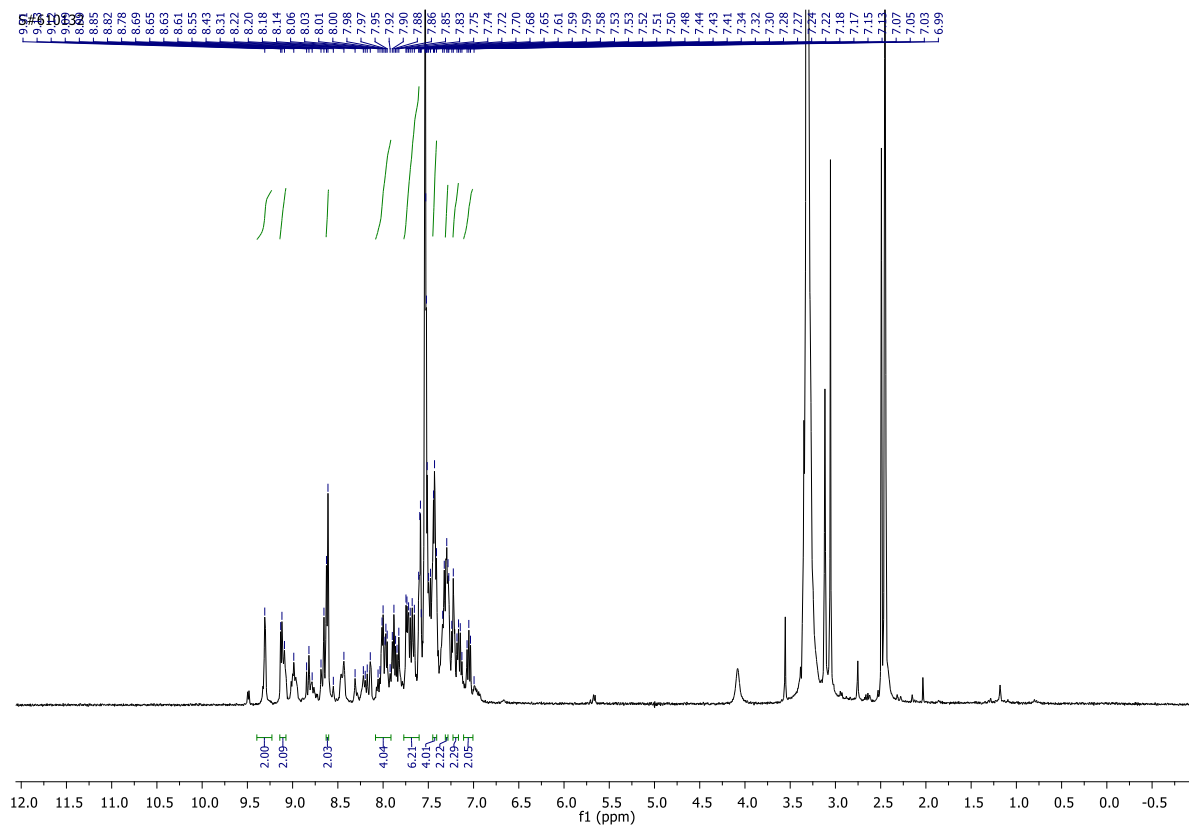

**Fig. S7.**  $^1\text{H-NMR}$  (400 MHz,  $\text{DMSO-}d_6$ ) spectra of complex **4** at 298 K.

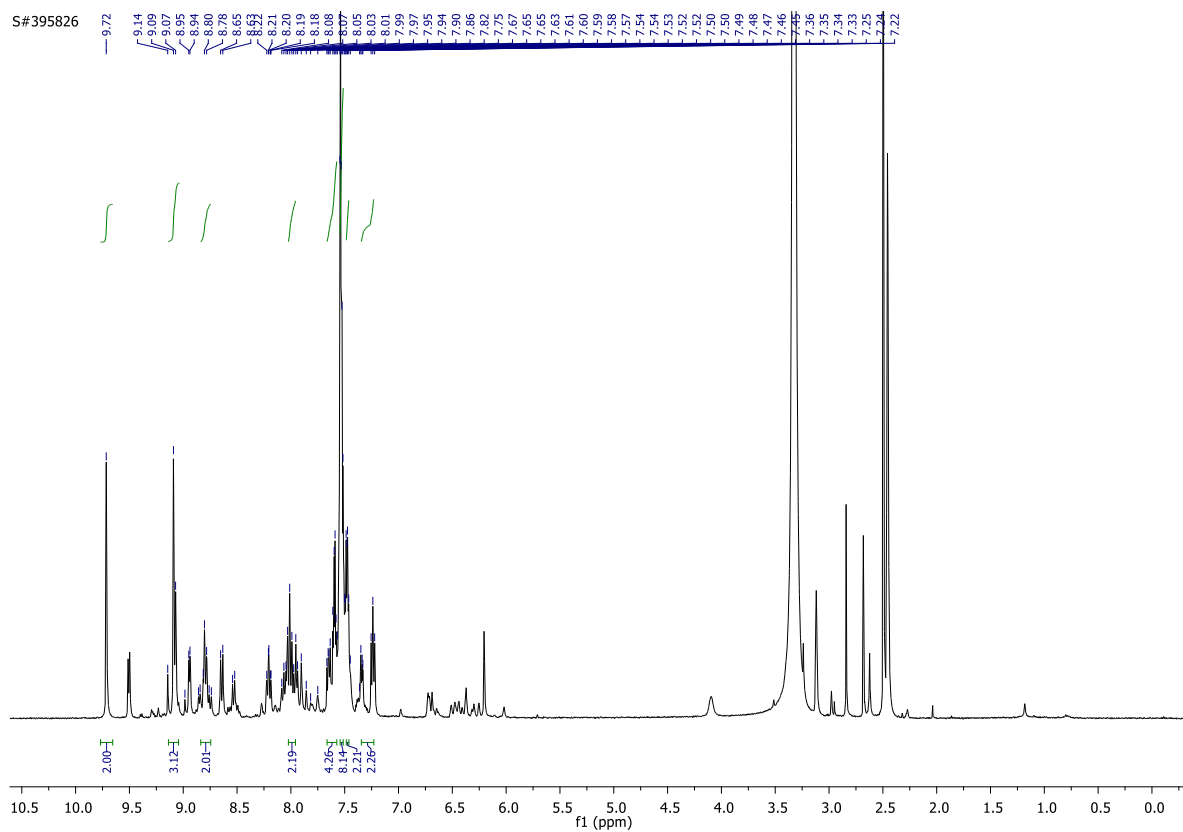

**Fig. S8.**  $^1\text{H-NMR}$  (400 MHz,  $\text{DMSO-}d_6$ ) spectra of complex **5** at 298 K.

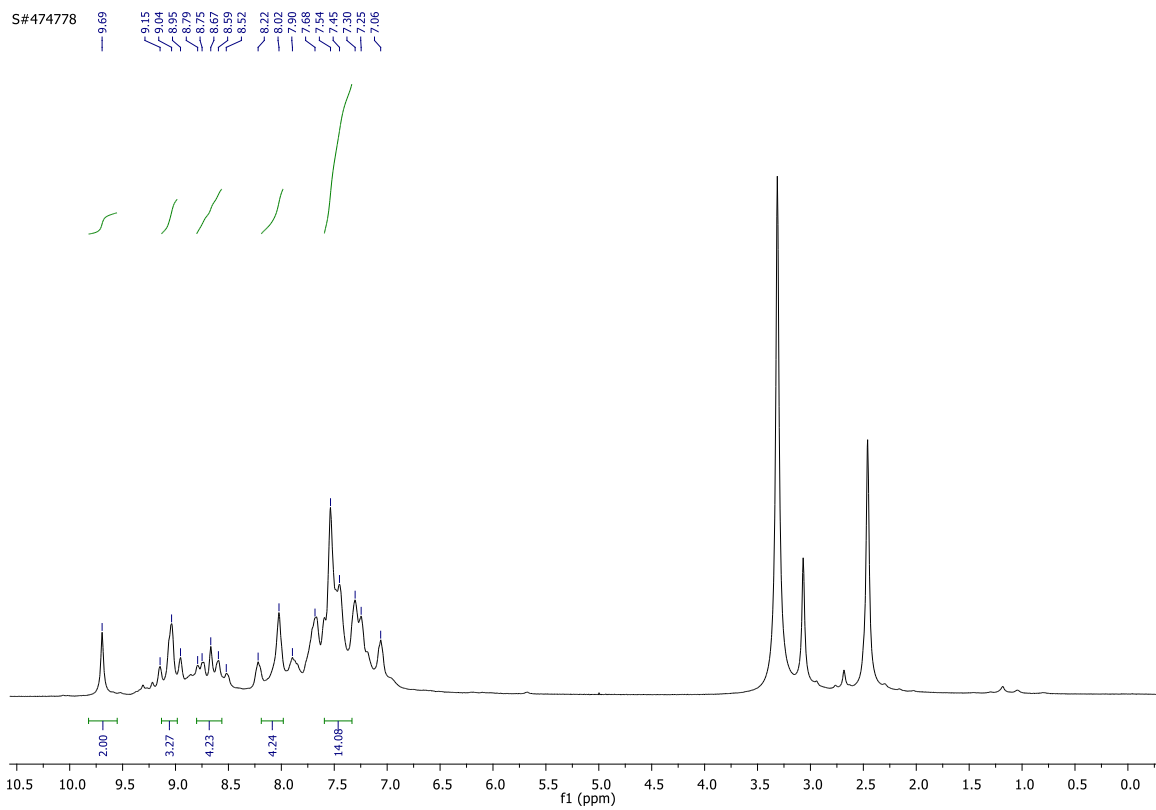

**Fig. S9.**  $^1\text{H-NMR}$  (400 MHz,  $\text{DMSO-}d_6$ ) spectra of complex **6** at 298 K.



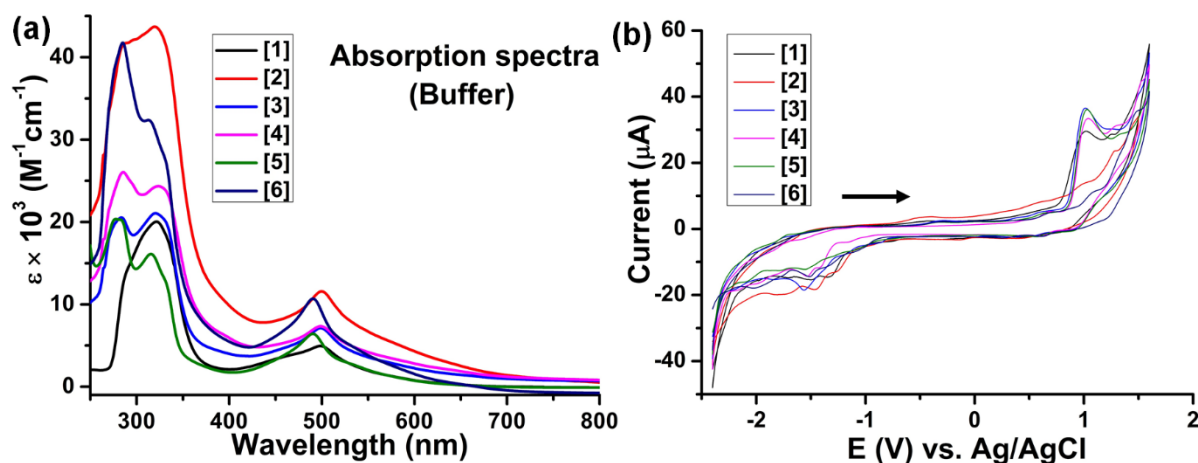

**Fig. S10.** (a) An overlay of UV-Vis spectra of the complexes **1–6** ( $20 \mu\text{M}$ ) in 1% (v/v) DMF–5 mM Tris-HCl/NaCl buffer (pH = 7.2). (b) Cyclic voltammogram overlay of the complexes **1–6** (1 mM) with scan rate  $50 \text{ mVs}^{-1}$  in DMF with  $0.1 \text{ M } ^n\text{Bu}_4\text{NClO}_4$  supporting electrolyte.

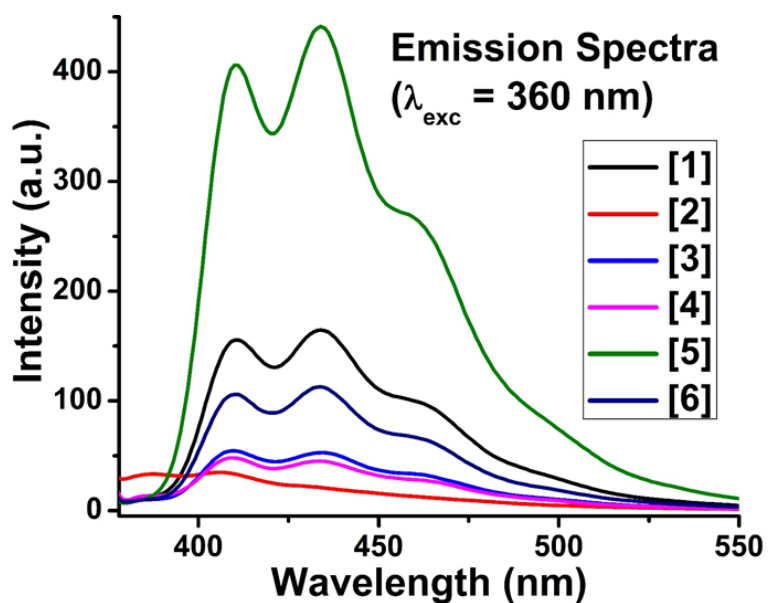

**Fig. S11.** Fluorescence spectral overlay ( $\lambda_{\text{ex}} = 360 \text{ nm}$ ) of the complexes **1–6** ( $10 \mu\text{M}$ ) in DMF.

**Table S1.** Selected crystallographic data and structure refinement parameters for complexes **1**, **2** and **3**.

| Parameters                                  | 1                                                                                      | 2                                                                              | 3                                                                              |
|---------------------------------------------|----------------------------------------------------------------------------------------|--------------------------------------------------------------------------------|--------------------------------------------------------------------------------|
| Empirical formula                           | C <sub>35.96</sub> H <sub>24.9</sub> N <sub>7</sub> O <sub>6.98</sub> RuS <sub>2</sub> | C <sub>40</sub> H <sub>27</sub> N <sub>7</sub> O <sub>7</sub> RuS <sub>2</sub> | C <sub>36</sub> H <sub>24</sub> N <sub>7</sub> O <sub>6</sub> RuS <sub>3</sub> |
| $M_r$                                       | 831.49                                                                                 | 882.87                                                                         | 847.87                                                                         |
| Crystal system                              | Triclinic                                                                              | Triclinic                                                                      | Orthorhombic                                                                   |
| Space group                                 | <i>P-1</i>                                                                             | <i>P-1</i>                                                                     | <i>Pbca</i>                                                                    |
| $a(\text{Å})$                               | 11.7775(8)                                                                             | 12.3256(13)                                                                    | 11.9146(5)                                                                     |
| $b(\text{Å})$                               | 13.4849(9)                                                                             | 12.6904(14)                                                                    | 16.9265(7)                                                                     |
| $c(\text{Å})$                               | 14.2982(9)                                                                             | 13.5220(13)                                                                    | 32.3157(13)                                                                    |
| $\alpha$ (deg)                              | 105.076(2)                                                                             | 82.577(4)                                                                      | 90.000                                                                         |
| $\beta$ (deg)                               | 114.080(2)                                                                             | 77.715(4)                                                                      | 90.000                                                                         |
| $\gamma$ (deg)                              | 92.307(2)                                                                              | 61.308(4)                                                                      | 90.000                                                                         |
| Volume (Å <sup>3</sup> )                    | 1974.1(2)                                                                              | 1812.0(3)                                                                      | 6517.2(5)                                                                      |
| $Z$                                         | 2                                                                                      | 2                                                                              | 8                                                                              |
| $\rho_{\text{calc}}/\text{cm}^3$            | 1.399                                                                                  | 1.618                                                                          | 1.728                                                                          |
| $\mu$ (mm <sup>-1</sup> )                   | 0.557                                                                                  | 0.612                                                                          | 0.736                                                                          |
| $F(000)$                                    | 843.0                                                                                  | 896.0                                                                          | 3432.0                                                                         |
| $T(\text{K})$                               | 273.15                                                                                 | 100(2)                                                                         | 100(2)                                                                         |
| $2\theta$ range for data collection(deg)    | 5.986 to 56.734                                                                        | 6.17 to 50.134                                                                 | 5.638 to 50.096                                                                |
| Limiting indices                            | -15 ≤ $h$ ≤ 15,<br>-17 ≤ $k$ ≤ 18,<br>-19 ≤ $l$ ≤ 19                                   | -14 ≤ $h$ ≤ 14, -15<br>≤ $k$ ≤ 15,<br>-16 ≤ $l$ ≤ 16                           | -14 ≤ $h$ ≤ 14,<br>-20 ≤ $k$ ≤ 20,<br>-38 ≤ $l$ ≤ 38                           |
| Reflections collected                       | 30386                                                                                  | 21668                                                                          | 100979                                                                         |
| Unique reflections                          | 9791                                                                                   | 6384                                                                           | 5764                                                                           |
| $R_{\text{int}}$                            | 0.0881                                                                                 | 0.1118                                                                         | 0.1008                                                                         |
| $T_{\text{min}}/T_{\text{max}}$             | 0.885/0.905                                                                            | 0.874/0.896                                                                    | 0.838/0.857                                                                    |
| Data/restraints/parameters                  | 9791/45/514                                                                            | 6384/0/514                                                                     | 5764/0/480                                                                     |
| GOF on $F^2$                                | 1.010                                                                                  | 1.055                                                                          | 1.093                                                                          |
| $R_1^a$ and $wR_2^b$ [ $I > 2\sigma(I)$ ]   | $R_1 = 0.0671$ ,<br>$wR_2 = 0.1610$                                                    | $R_1 = 0.0729$ ,<br>$wR_2 = 0.1299$                                            | $R_1 = 0.0387$ ,<br>$wR_2 = 0.0833$                                            |
| $R_1$ and $wR_2$ (all data)                 | $R_1 = 0.1093$ ,<br>$wR_2 = 0.1826$                                                    | $R_1 = 0.1124$ ,<br>$wR_2 = 0.1443$                                            | $R_1 = 0.0554$ ,<br>$wR_2 = 0.0936$                                            |
| Largest diff. peak/hole (eÅ <sup>-3</sup> ) | 2.29/-1.32                                                                             | 1.19/-0.69                                                                     | 0.95/-0.59                                                                     |
| CCDC deposition serial number               | 2096938                                                                                | 2096939                                                                        | 2096940                                                                        |

<sup>a</sup> $R_1 = \sum||F_o| - |F_c|| / \sum|F_o|$ ; <sup>b</sup> $wR_2 = \{\sum[w(F_o^2 - F_c^2)^2] / \sum[w(F_o^2)^2]\}^{1/2}$ . Goodness-of-fit (GOF) =  $\{\sum[w(F_o^2 - F_c^2)^2] / (n-p)\}^{1/2}$ , where  $n$  = number of data and  $p$  = number of parameters refined.

**Table S2.** Selected crystallographic data and structure refinement parameters for the complexes **4**, **5** and **6**.

| Parameters                                                                                                       | 4                                                                              | 5                                                                              | 6                                                                              |
|------------------------------------------------------------------------------------------------------------------|--------------------------------------------------------------------------------|--------------------------------------------------------------------------------|--------------------------------------------------------------------------------|
| Empirical formula                                                                                                | C <sub>40</sub> H <sub>26</sub> N <sub>7</sub> O <sub>6</sub> RuS <sub>3</sub> | C <sub>37</sub> H <sub>26</sub> N <sub>8</sub> O <sub>6</sub> RuS <sub>2</sub> | C <sub>41</sub> H <sub>28</sub> N <sub>8</sub> O <sub>6</sub> RuS <sub>2</sub> |
| <i>M<sub>r</sub></i>                                                                                             | 897.93                                                                         | 843.85                                                                         | 893.90                                                                         |
| Crystal system                                                                                                   | Triclinic                                                                      | Triclinic                                                                      | Triclinic                                                                      |
| Space group                                                                                                      | P-1                                                                            | P-1                                                                            | P-1                                                                            |
| <i>a</i> (Å)                                                                                                     | 12.0404(8)                                                                     | 9.8383(4)                                                                      | 12.4757(5)                                                                     |
| <i>b</i> (Å)                                                                                                     | 14.6966(11)                                                                    | 11.6116(5)                                                                     | 12.9156(5)                                                                     |
| <i>c</i> (Å)                                                                                                     | 14.9939(10)                                                                    | 16.4777(7)                                                                     | 13.4640(5)                                                                     |
| <i>α</i> (deg)                                                                                                   | 105.898(2)                                                                     | 83.7270(10)                                                                    | 86.0730(10)                                                                    |
| <i>b</i> (deg)                                                                                                   | 101.054(2)                                                                     | 85.1190(10)                                                                    | 78.2220(10)                                                                    |
| <i>γ</i> (deg)                                                                                                   | 111.592(2)                                                                     | 73.6830(10)                                                                    | 61.2780(10)                                                                    |
| Volume (Å <sup>3</sup> )                                                                                         | 2242.1(3)                                                                      | 1792.83(13)                                                                    | 1861.38(13)                                                                    |
| <i>Z</i>                                                                                                         | 2                                                                              | 2                                                                              | 2                                                                              |
| $\rho_{\text{calc}}$ (g/cm <sup>3</sup> )                                                                        | 1.330                                                                          | 1.563                                                                          | 1.595                                                                          |
| $\mu$ (mm <sup>-1</sup> )                                                                                        | 0.539                                                                          | 0.613                                                                          | 0.596                                                                          |
| <i>F</i> (000)                                                                                                   | 910.0                                                                          | 856.0                                                                          | 908.0                                                                          |
| <i>T</i> (K)                                                                                                     | 100(2)                                                                         | 273(2)                                                                         | 100(2)                                                                         |
| 2 $\theta$ range for data collection(deg)                                                                        | 4.82 to 50.1                                                                   | 4.842 to 50.09                                                                 | 6.186 to 56.674                                                                |
| Limiting indices                                                                                                 | -14 ≤ <i>h</i> ≤ 14,<br>-17 ≤ <i>k</i> ≤ 17,<br>-17 ≤ <i>l</i> ≤ 17            | -11 ≤ <i>h</i> ≤ 11,<br>-13 ≤ <i>k</i> ≤ 13,<br>-19 ≤ <i>l</i> ≤ 19            | -16 ≤ <i>h</i> ≤ 16,<br>-17 ≤ <i>k</i> ≤ 17,<br>-17 ≤ <i>l</i> ≤ 17            |
| Reflections collected                                                                                            | 27350                                                                          | 21914                                                                          | 29267                                                                          |
| Unique reflections                                                                                               | 7926                                                                           | 6333                                                                           | 9250                                                                           |
| <i>R</i> <sub>int</sub>                                                                                          | 0.0698                                                                         | 0.0485                                                                         | 0.0306                                                                         |
| <i>T</i> <sub>min</sub> / <i>T</i> <sub>max</sub>                                                                | 0.898/0.917                                                                    | 0.863/0.896                                                                    | 0.867/0.888                                                                    |
| Data/restraints/parameters                                                                                       | 7926/3/466                                                                     | 6333/0/484                                                                     | 9250/0/523                                                                     |
| GOF on <i>F</i> <sup>2</sup>                                                                                     | 1.067                                                                          | 1.026                                                                          | 1.049                                                                          |
| <i>R</i> <sub>1</sub> <sup>a</sup> and <i>wR</i> <sub>2</sub> <sup>b</sup> [ <i>I</i> > 2 $\sigma$ ( <i>I</i> )] | <i>R</i> <sub>1</sub> = 0.0706,<br><i>wR</i> <sub>2</sub> = 0.1851             | <i>R</i> <sub>1</sub> = 0.0378,<br><i>wR</i> <sub>2</sub> = 0.0845             | <i>R</i> <sub>1</sub> = 0.0337,<br><i>wR</i> <sub>2</sub> = 0.0830             |
| <i>R</i> <sub>1</sub> and <i>wR</i> <sub>2</sub> (all data)                                                      | <i>R</i> <sub>1</sub> = 0.0922,<br><i>wR</i> <sub>2</sub> = 0.2043             | <i>R</i> <sub>1</sub> = 0.0502,<br><i>wR</i> <sub>2</sub> = 0.0898             | <i>R</i> <sub>1</sub> = 0.0430,<br><i>wR</i> <sub>2</sub> = 0.0894             |
| Largest diff. peak/hole (eÅ <sup>-3</sup> )                                                                      | 3.96/-2.09                                                                     | 0.94/-0.94                                                                     | 0.71/-0.80                                                                     |
| CCDC deposition serial number                                                                                    | 2096941                                                                        | 2096942                                                                        | 2096943                                                                        |

<sup>a</sup>*R*<sub>1</sub> =  $\Sigma||F_o| - |F_c|| / \Sigma|F_o|$ ; <sup>b</sup>*wR*<sub>2</sub> =  $\{\Sigma[w(F_o^2 - F_c^2)^2] / \Sigma[w(F_o^2)^2]\}^{1/2}$ . Goodness-of-fit (GOF) =  $\{\Sigma[w(F_o^2 - F_c^2)^2] / (n - p)\}^{1/2}$ , where *n* = number of data and *p* = number of parameters refined.

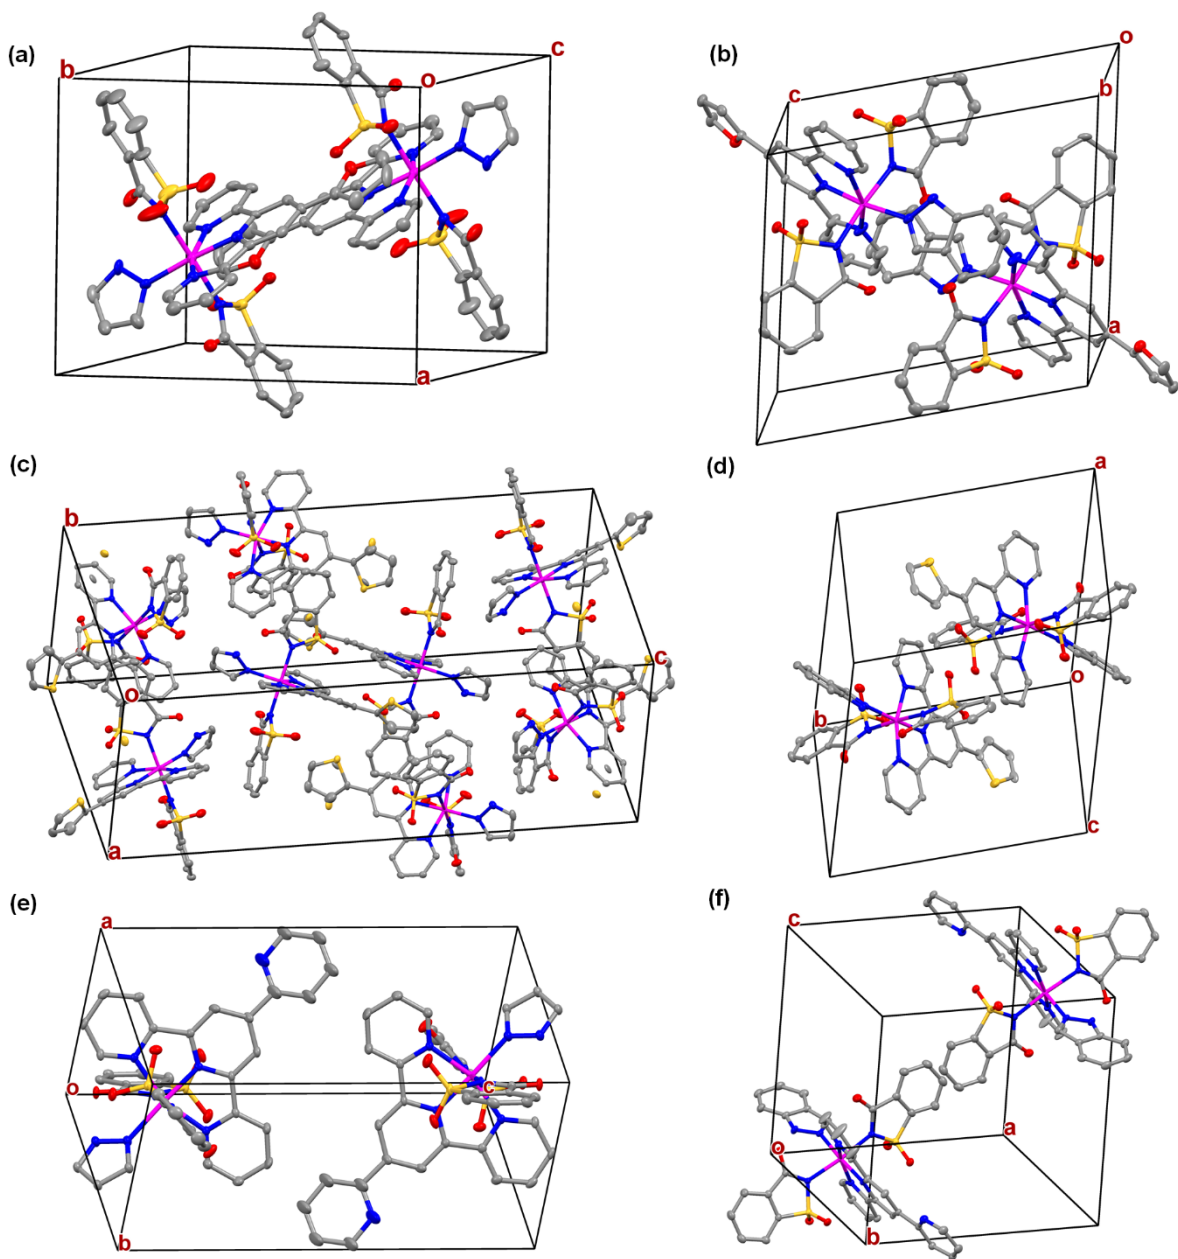

**Fig. S12.** Unit cell diagram of the complexes (a) **1**; (b) **2**; (c) **3**; (d) **4**; (e) **5** and (f) **6**.

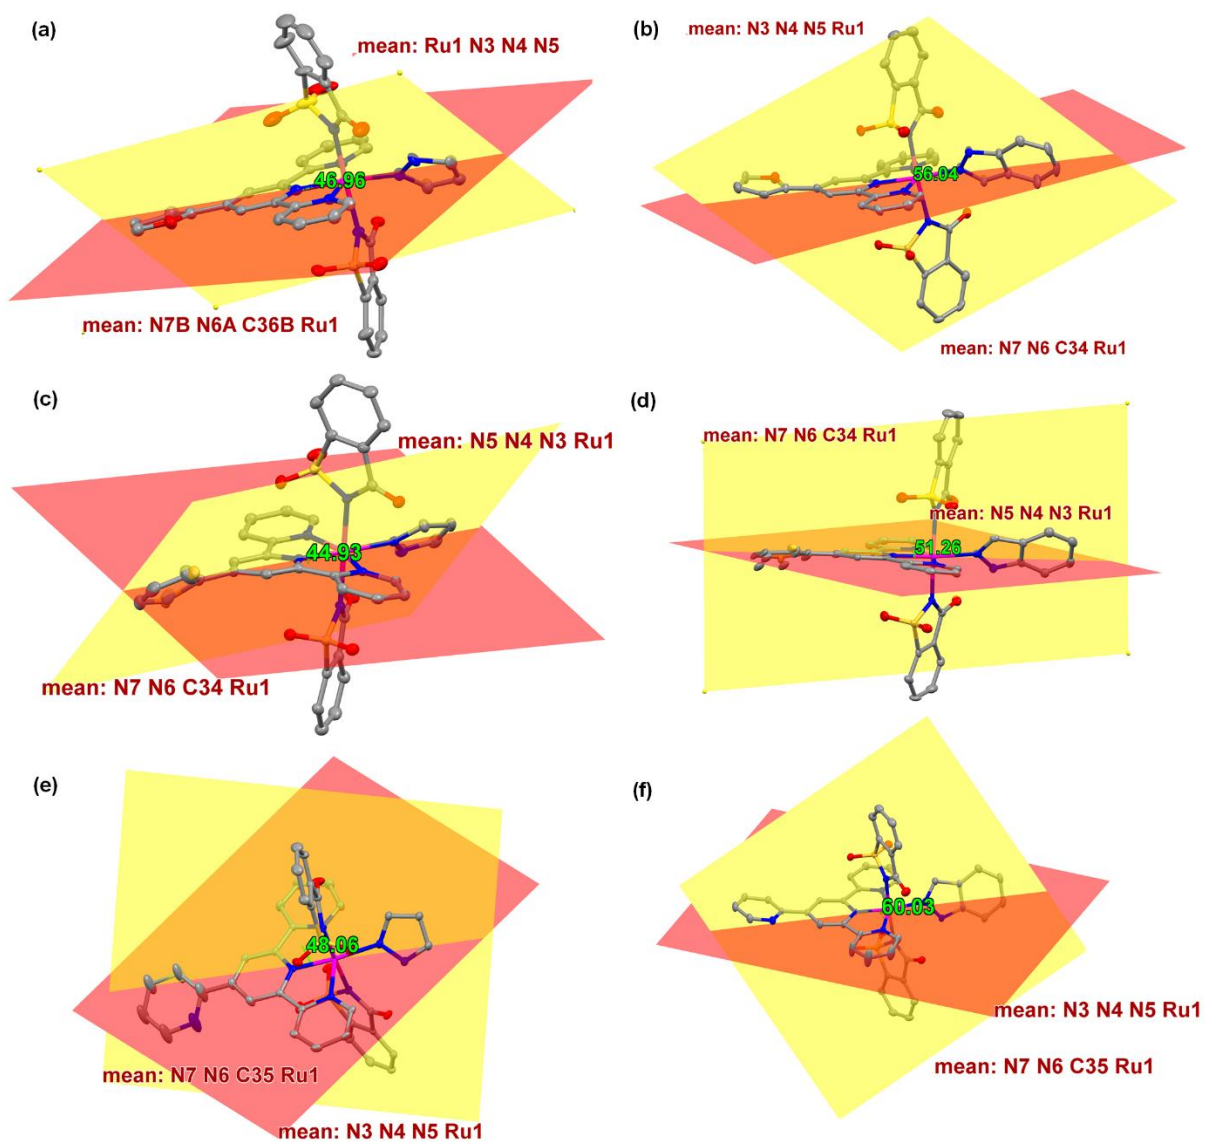

**Fig. S13.** Dihedral angle between the planes of R-tpy and 1, 2 azoles containing Ru-centre (a) 1; (b) 2; (c) 3; (d) 4; (e) 5 and (f) 6.

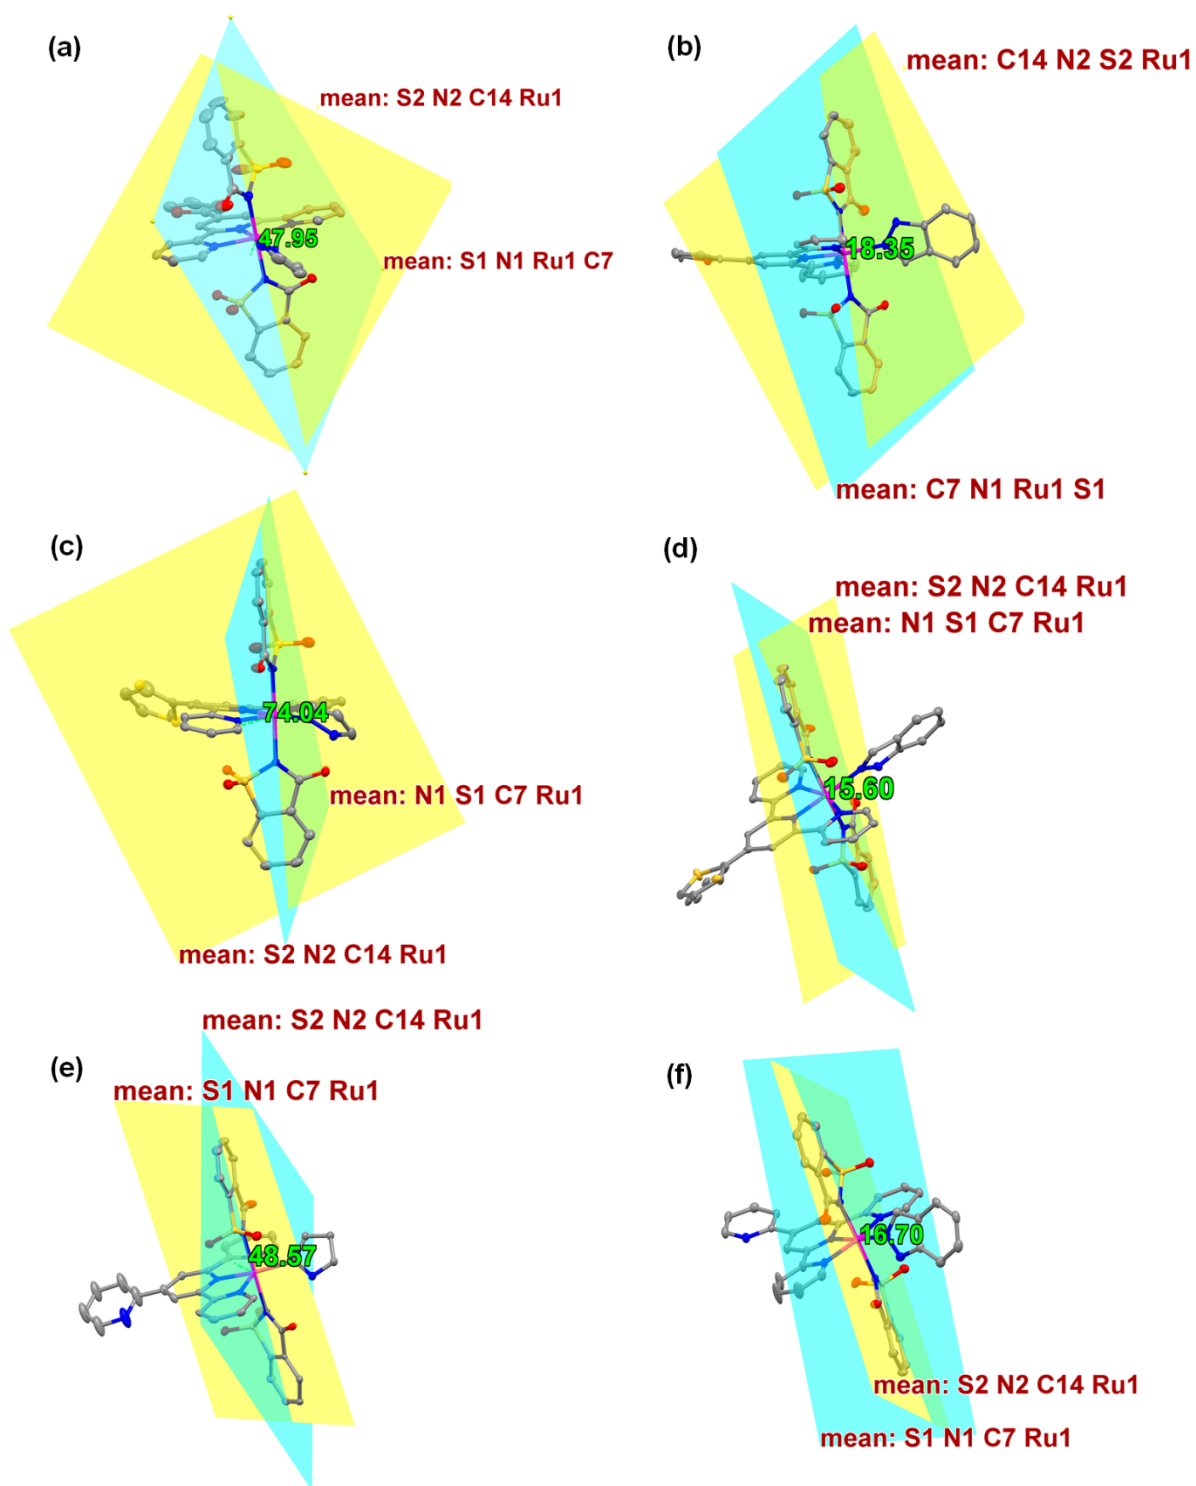

**Fig. S14.** Dihedral angle between the planes of sac and sac containing Ru centre (a) **1**; (b) **2**; (c) **3**; (d) **4**; (e) **5** and (f) **6**.

**Table S3.** Selected bond lengths and bond angles obtained from the X-ray structures of the complexes **1** and **2**.

| Bond lengths (Å) (1) |            | Bond lengths (Å) (2) |          |
|----------------------|------------|----------------------|----------|
| Ru1-N3               | 2.084(4)   | Ru1-N6               | 2.110(5) |
| Ru1-N5               | 2.069(4)   | Ru1-N2               | 2.159(6) |
| Ru1-N4               | 1.942(4)   | Ru1-N3               | 2.084(6) |
| Ru1-N2               | 2.141(4)   | Ru1-N1               | 2.115(6) |
| Ru1-N1               | 2.138(4)   | Ru1-N5               | 2.065(5) |
| Ru1-N6A              | 2.107(5)   | Ru1-N4               | 1.932(6) |
| Ru1-N6B              | 2.117(10)  |                      |          |
| Bond Angles (deg)    |            | Bond Angles (deg)    |          |
| N3-Ru1-N2            | 92.82(14)  | N5-Ru1-N2            | 92.4(2)  |
| N3-Ru1-N1            | 87.39(15)  | N5-Ru1-N1            | 84.8(2)  |
| N3-Ru1-N6A           | 99.9(3)    | N3-Ru1-N6            | 106.0(2) |
| N3-Ru1-N6B           | 101.2(4)   | N3-Ru1-N2            | 86.9(2)  |
| N5-Ru1-N3            | 159.07(16) | N3-Ru1-N1            | 89.1(2)  |
| N5-Ru1-N2            | 89.57(14)  | N1-Ru1-N2            | 174.3(2) |
| N5-Ru1-N1            | 90.96(15)  | N5-Ru1-N6            | 95.3(2)  |
| N5-Ru1-N6A           | 101.0(3)   | N5-Ru1-N2            | 92.6(2)  |
| N5-Ru1-N6B           | 99.7(4)    | N5-Ru1-N3            | 158.7(2) |
| N4-Ru1-N3            | 79.21(15)  | N5-Ru1-N1            | 92.7(2)  |
| N4-Ru1-N5            | 80.00(16)  | N4-Ru1-N6            | 172.8(3) |
| N4-Ru1-N2            | 89.82(15)  | N4-Ru1-N2            | 93.1(2)  |
| N4-Ru1-N1            | 92.19(15)  | N4-Ru1-N3            | 78.8(3)  |
| N4-Ru1-N6A           | 175.3(3)   | N4-Ru1-N1            | 90.0(2)  |
| N4-Ru1-N6B           | 178.9(4)   | N4-Ru1-N5            | 79.9(2)  |
| N1-Ru1-N2            | 177.98(15) |                      |          |
| N6A-Ru1-N2           | 85.6(3)    |                      |          |
| N6A-Ru1-N1           | 92.4(3)    |                      |          |
| N6B-Ru1-N2           | 89.1(4)    |                      |          |
| N6B-Ru1-N1           | 88.9(4)    |                      |          |

**Table S4.** Selected bond lengths and bond angles obtained from the X-ray structures of the complexes **3** and **4**.

| Bond lengths (Å) ( <b>3</b> ) |            | Bond lengths (Å) ( <b>4</b> ) |          |
|-------------------------------|------------|-------------------------------|----------|
| Ru1-N6                        | 2.131(3)   | Ru1-N3                        | 2.082(5) |
| Ru1-N4                        | 1.938(3)   | Ru1-N6                        | 2.123(6) |
| Ru1-N5                        | 2.085(3)   | Ru1-N4                        | 1.954(6) |
| Ru1-N3                        | 2.066(3)   | Ru1-N2                        | 2.155(6) |
| Ru1-N1                        | 2.139(3)   | Ru1-N5                        | 2.087(6) |
| Ru1-N2                        | 2.185(3)   | Ru1-N1                        | 2.128(6) |
| Bond Angles (deg)             |            | Bond Angles (deg)             |          |
| N6-Ru1-N1                     | 88.16(12)  | N3-Ru1-N6                     | 95.2(2)  |
| N6-Ru1-N2                     | 91.96(11)  | N3-Ru1-N2                     | 93.9(2)  |
| N4-Ru1-N6                     | 177.98(13) | N3-Ru1-N1                     | 92.8(2)  |
| N4-Ru1-N5                     | 79.51(12)  | N6-Ru1-N2                     | 92.6(2)  |
| N4-Ru1-N3                     | 79.81(12)  | N6-Ru1-N1                     | 84.3(2)  |
| N4-Ru1-N1                     | 89.84(12)  | N4-Ru1-N3                     | 79.3(2)  |
| N4-Ru1-N2                     | 90.03(12)  | N4-Ru1-N6                     | 172.4(2) |
| N5-Ru1-N6                     | 100.90(12) | N4-Ru1-N2                     | 92.9(2)  |
| N5-Ru1-N1                     | 93.63(12)  | N4-Ru1-N5                     | 78.9(2)  |
| N5-Ru1-N2                     | 87.64(12)  | N4-Ru1-N1                     | 90.7(2)  |
| N3-Ru1-N6                     | 99.81(12)  | N5-Ru1-N3                     | 158.2(2) |
| N3-Ru1-N5                     | 159.29(12) | N5-Ru1-N6                     | 106.6(2) |
| N3-Ru1-N1                     | 87.49(12)  | N5-Ru1-N2                     | 86.3(2)  |
| N3-Ru1-N2                     | 91.19(11)  | N5-Ru1-N1                     | 89.3(2)  |
| N1-Ru1-N2                     | 178.68(12) | N1-Ru1-N2                     | 173.7(2) |



**Table S5.** Selected bond lengths and bond angles obtained from the X-ray structures of the complexes **5** and **6**.

| Bond lengths (Å) ( <b>5</b> ) |            | Bond lengths (Å) ( <b>6</b> ) |            |
|-------------------------------|------------|-------------------------------|------------|
| Ru1-N4                        | 1.940(3)   | Ru1-N4                        | 1.9525(18) |
| Ru1-N2                        | 2.138(2)   | Ru1-N1                        | 2.1219(19) |
| Ru1-N1                        | 2.155(2)   | Ru1-N2                        | 2.1587(19) |
| Ru1-N5                        | 2.091(3)   | Ru1-N3                        | 2.099(2)   |
| Ru1-N3                        | 2.068(3)   | Ru1-N5                        | 2.0767(19) |
| Ru1-N6                        | 2.132(3)   | Ru1-N6                        | 2.1162(19) |
| Bond Angles (deg)             |            | Bond Angles (deg)             |            |
| N4-Ru1-N2                     | 89.95(10)  | N4-Ru1-N1                     | 90.59(7)   |
| N4-Ru1-N1                     | 91.67(10)  | N4-Ru1-N2                     | 92.36(7)   |
| N4-Ru1-N5                     | 79.50(10)  | N4-Ru1-N3                     | 79.09(7)   |
| N4-Ru1-N3                     | 79.84(10)  | N4-Ru1-N5                     | 79.64(7)   |
| N4-Ru1-N6                     | 174.38(10) | N4-Ru1-N6                     | 173.14(8)  |
| N2-Ru1-N1                     | 177.90(9)  | N1-Ru1-N2                     | 175.26(7)  |
| N5-Ru1-N2                     | 92.77(9)   | N3-Ru1-N1                     | 90.09(8)   |
| N5-Ru1-N1                     | 86.22(10)  | N3-Ru1-N2                     | 86.83(7)   |
| N5-Ru1-N6                     | 102.66(10) | N3-Ru1-N6                     | 105.93(7)  |
| N3-Ru1-N2                     | 90.20(10)  | N5-Ru1-N1                     | 91.82(7)   |
| N3-Ru1-N1                     | 91.39(10)  | N5-Ru1-N2                     | 92.36(7)   |
| N3-Ru1-N5                     | 159.12(10) | N5-Ru1-N3                     | 158.66(7)  |
| N3-Ru1-N6                     | 98.19(10)  | N5-Ru1-N6                     | 95.41(7)   |
| N6-Ru1-N2                     | 84.78(10)  | N6-Ru1-N1                     | 84.80(7)   |
| N6-Ru1-N1                     | 93.64(10)  | N6-Ru1-N2                     | 92.58(7)   |

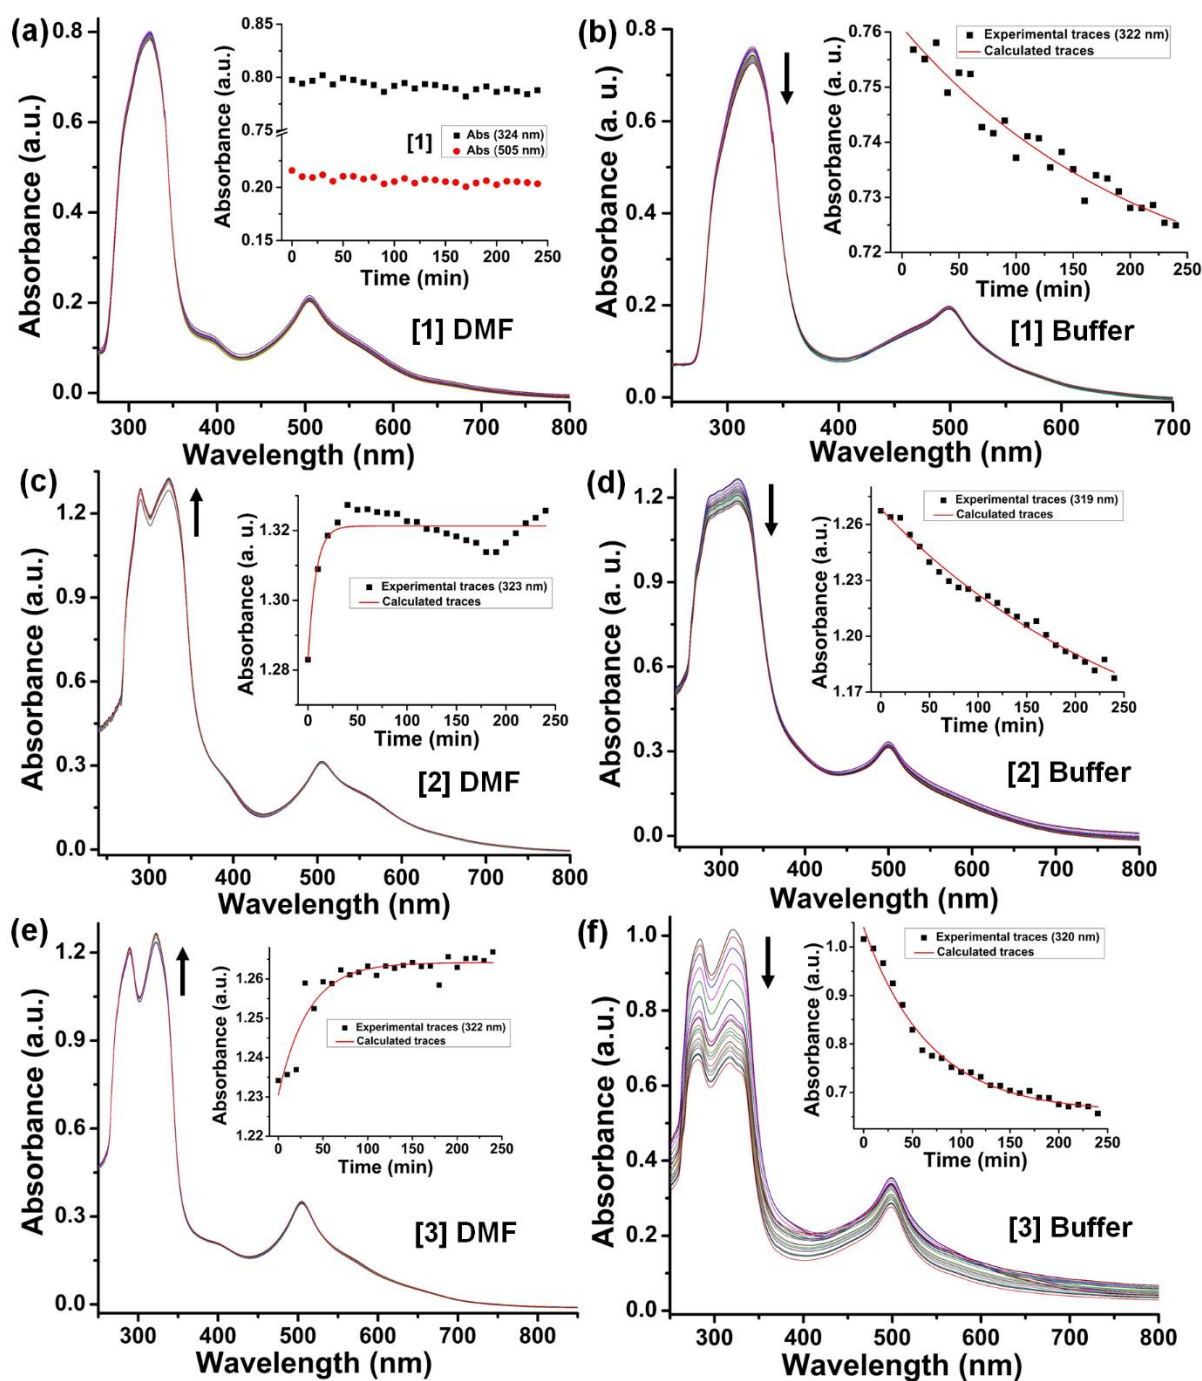

**Fig. S15.** Solvolysis of the complexes in DMF and in 2% (v/v) DMF–5 mM Tris-HCl/NaCl buffer (pH = 7.2) evident from concomitant changes in absorbance spectral profile at  $T = 298$  K for 4 h. (a) **1** ( $39 \mu\text{M}$ ) in DMF; (b) **1** ( $39 \mu\text{M}$ ) in DMF–buffer; (c) **2** ( $30 \mu\text{M}$ ) in DMF; (d) **2** ( $30 \mu\text{M}$ ) in DMF–buffer; (e) **3** ( $49 \mu\text{M}$ ) in DMF and (f) **3** ( $49 \mu\text{M}$ ) in DMF–buffer.

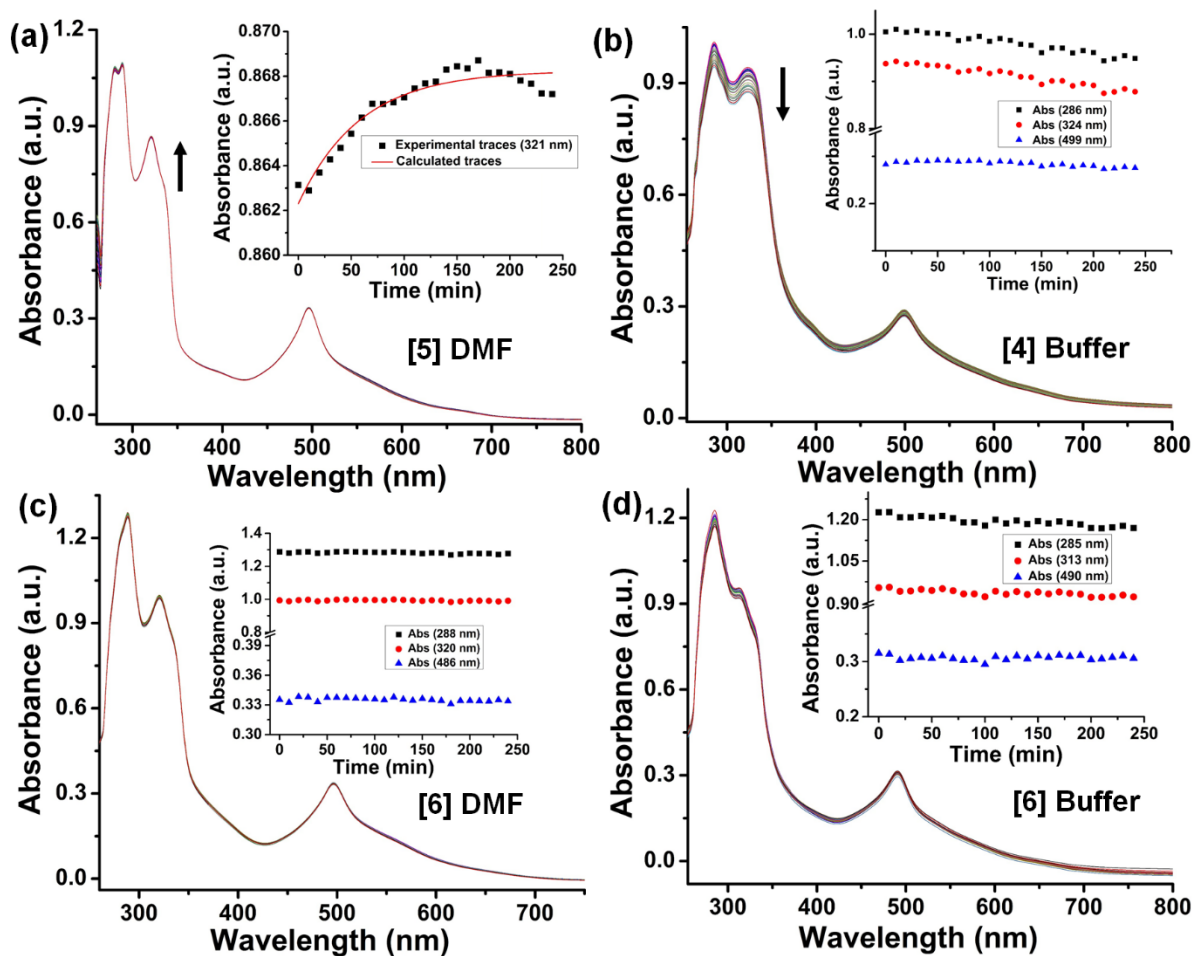

**Fig. S16.** Solvolysis of the complexes in DMF and in 2% (v/v) DMF–5 mM Tris-HCl/NaCl buffer (pH = 7.2) evident from concomitant changes in absorbance spectral profile at  $T = 298$  K for 4 h. (a) **5** ( $49 \mu\text{M}$ ) in DMF; (b) **4** ( $39 \mu\text{M}$ ) in DMF–buffer; (c) **6** ( $29 \mu\text{M}$ ) in DMF and (d) **6** ( $29 \mu\text{M}$ ) in DMF–buffer.

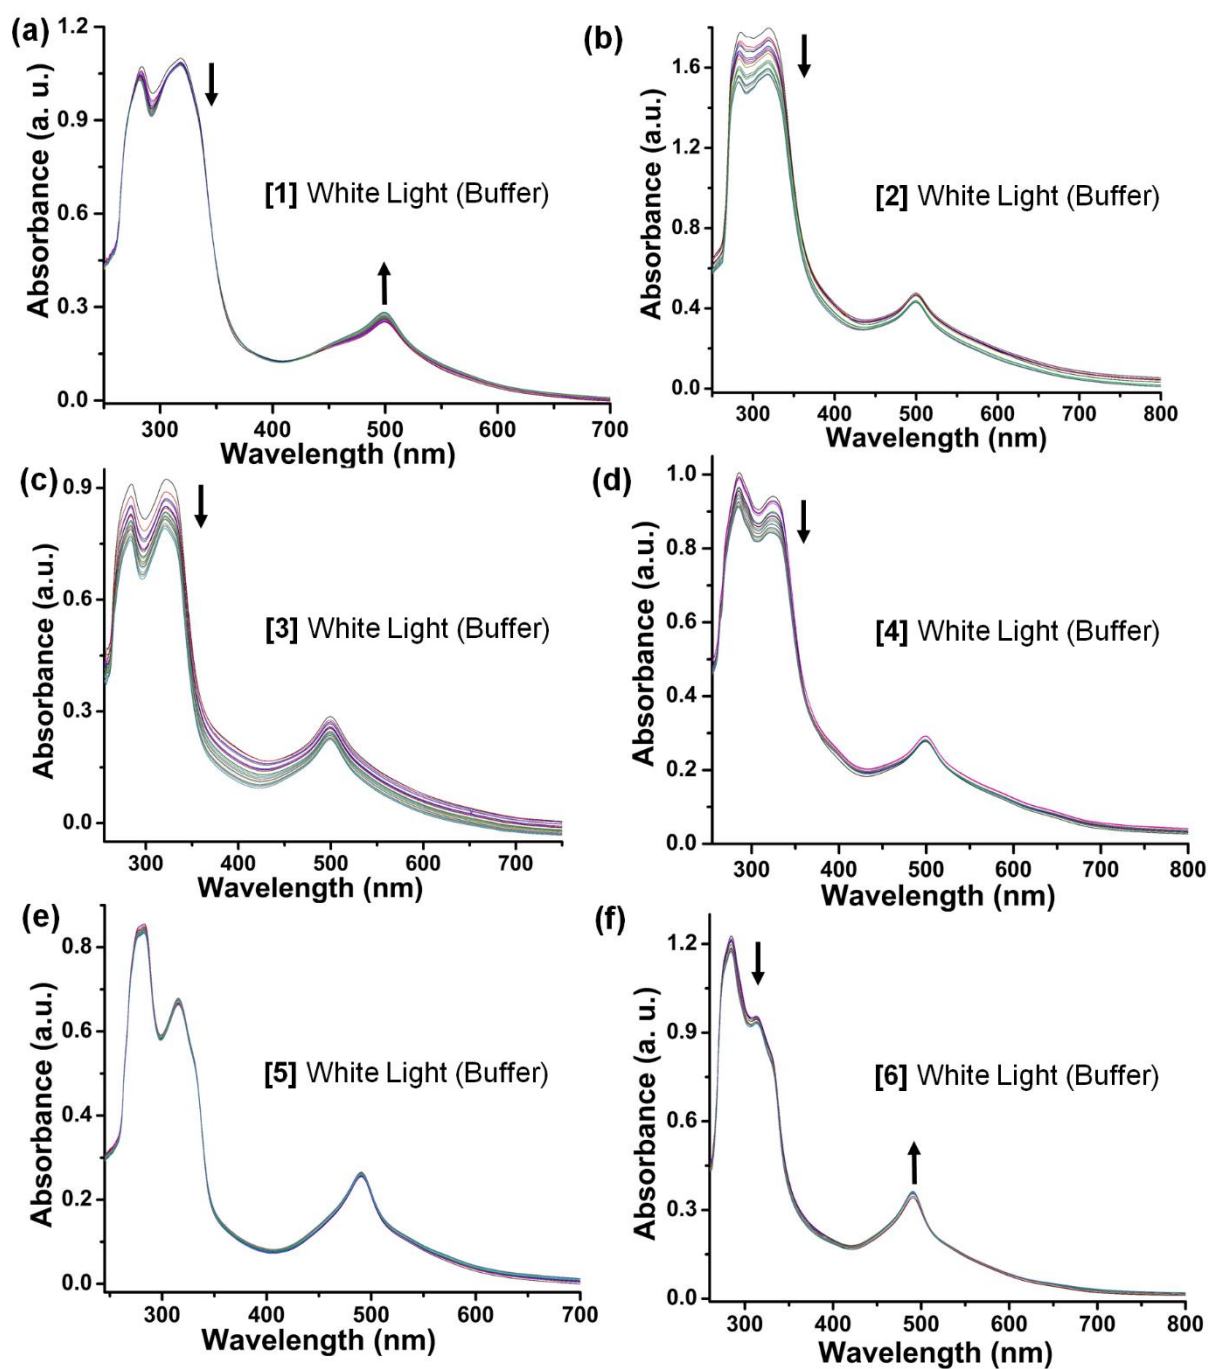

**Fig. S17.** Photoirradiation of white light ( $\lambda_{exc} > 400$  nm) to the complexes (a) **1** ( $58 \mu\text{M}$ ); (b) **2** ( $39 \mu\text{M}$ ); (c) **3** ( $39 \mu\text{M}$ ); (d) **4** ( $39 \mu\text{M}$ ); (e) **5** ( $39 \mu\text{M}$ ) and (f) **6** ( $29 \mu\text{M}$ ) for the 0–100 min in 2 % (v/v) DMF–5 mM Tris-HCl/NaCl buffer (pH = 7.2) mixture.  $T = 298$  K.

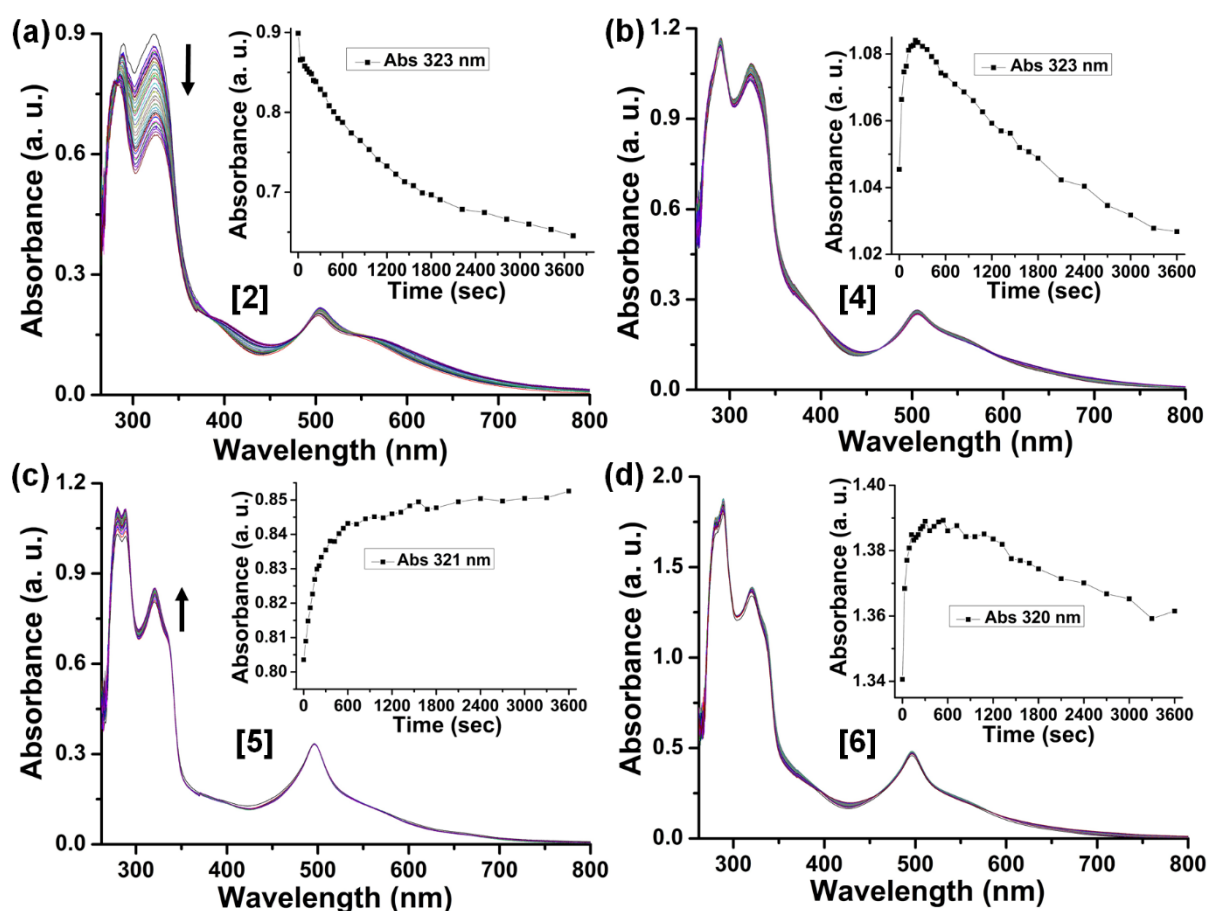

**Fig. S18.** Green light ( $\lambda_{exc} = 530$  nm, 3V, 158 lm @ 700mA) induced changes in absorption spectral traces of the complexes in DMF for the period of 0–60 min. (a) **2** (20  $\mu$ M), inset: Changes in  $A_{323\text{ nm}}$  upon photoirradiation; (b) **4** (39  $\mu$ M), inset: Changes in  $A_{323\text{ nm}}$  upon photoirradiation; (c) **5** (39  $\mu$ M), inset: Changes in  $A_{321\text{ nm}}$  upon photoirradiation and (d) **6** (39  $\mu$ M), inset: Changes in  $A_{320\text{ nm}}$  upon photoirradiation.

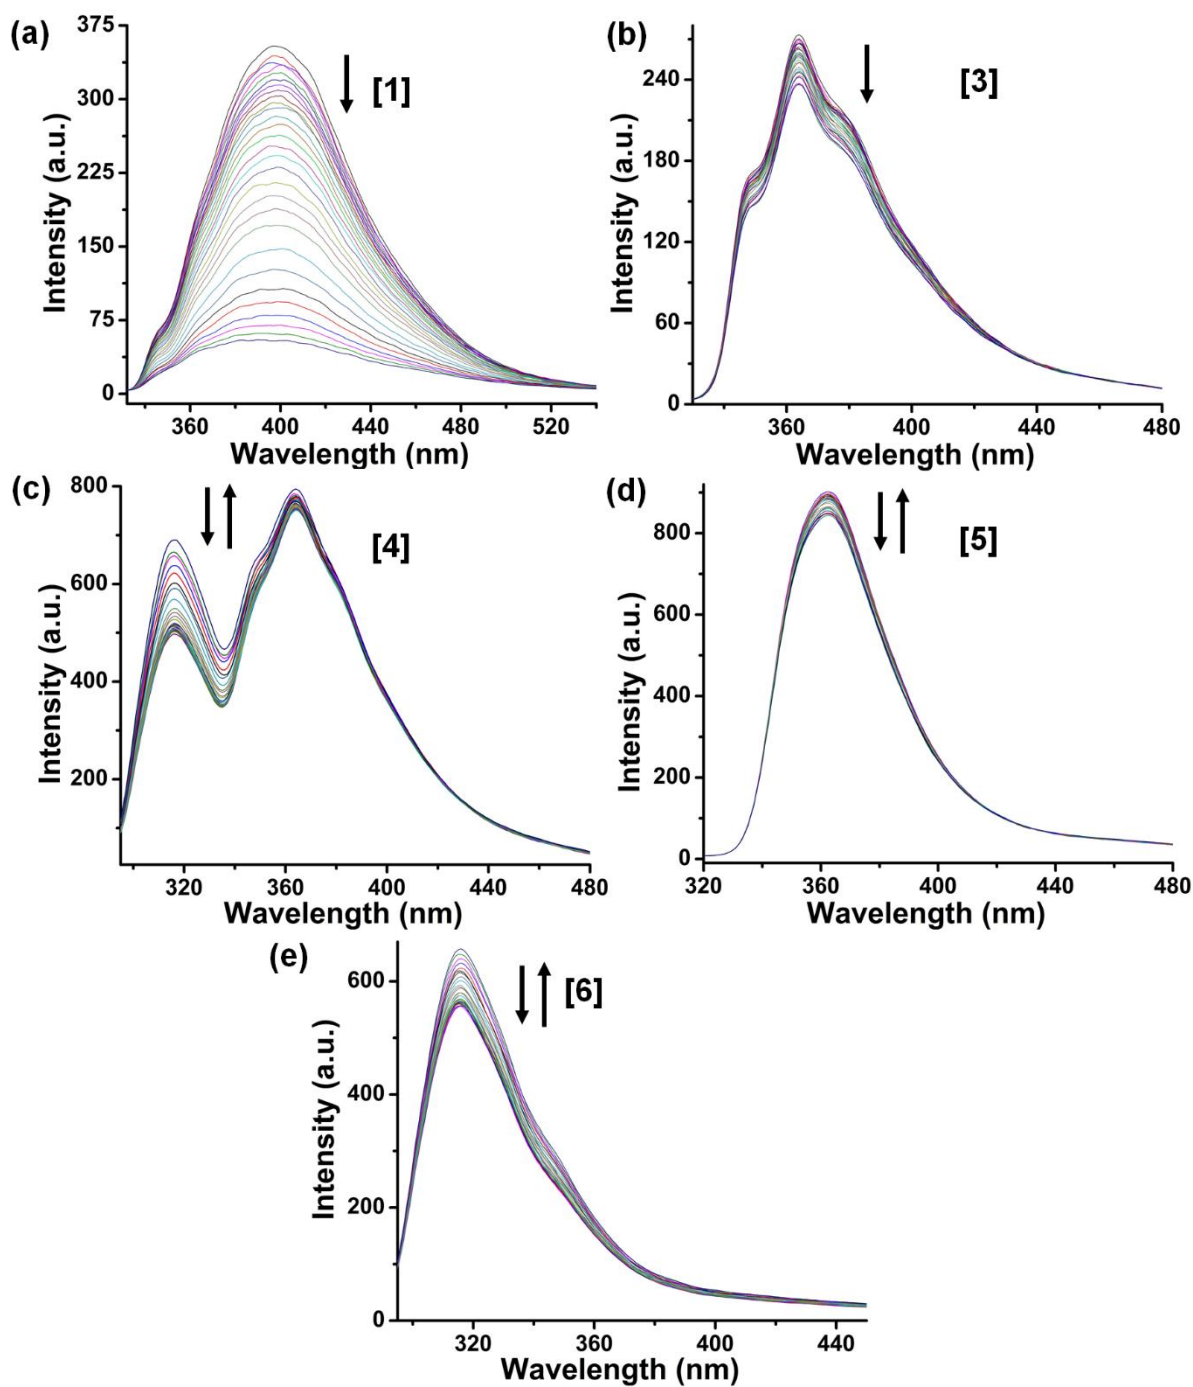

**Fig. S19.** Green light ( $\lambda_{exc} = 530$  nm, 3V, 158 lm @ 700mA) induced changes in emission spectral traces of the complexes (20  $\mu$ M) in DMF, (a) **1**; (b) **3**; (c) **4**; (d) **5** and (e) **6** for the period of 0–60 min.

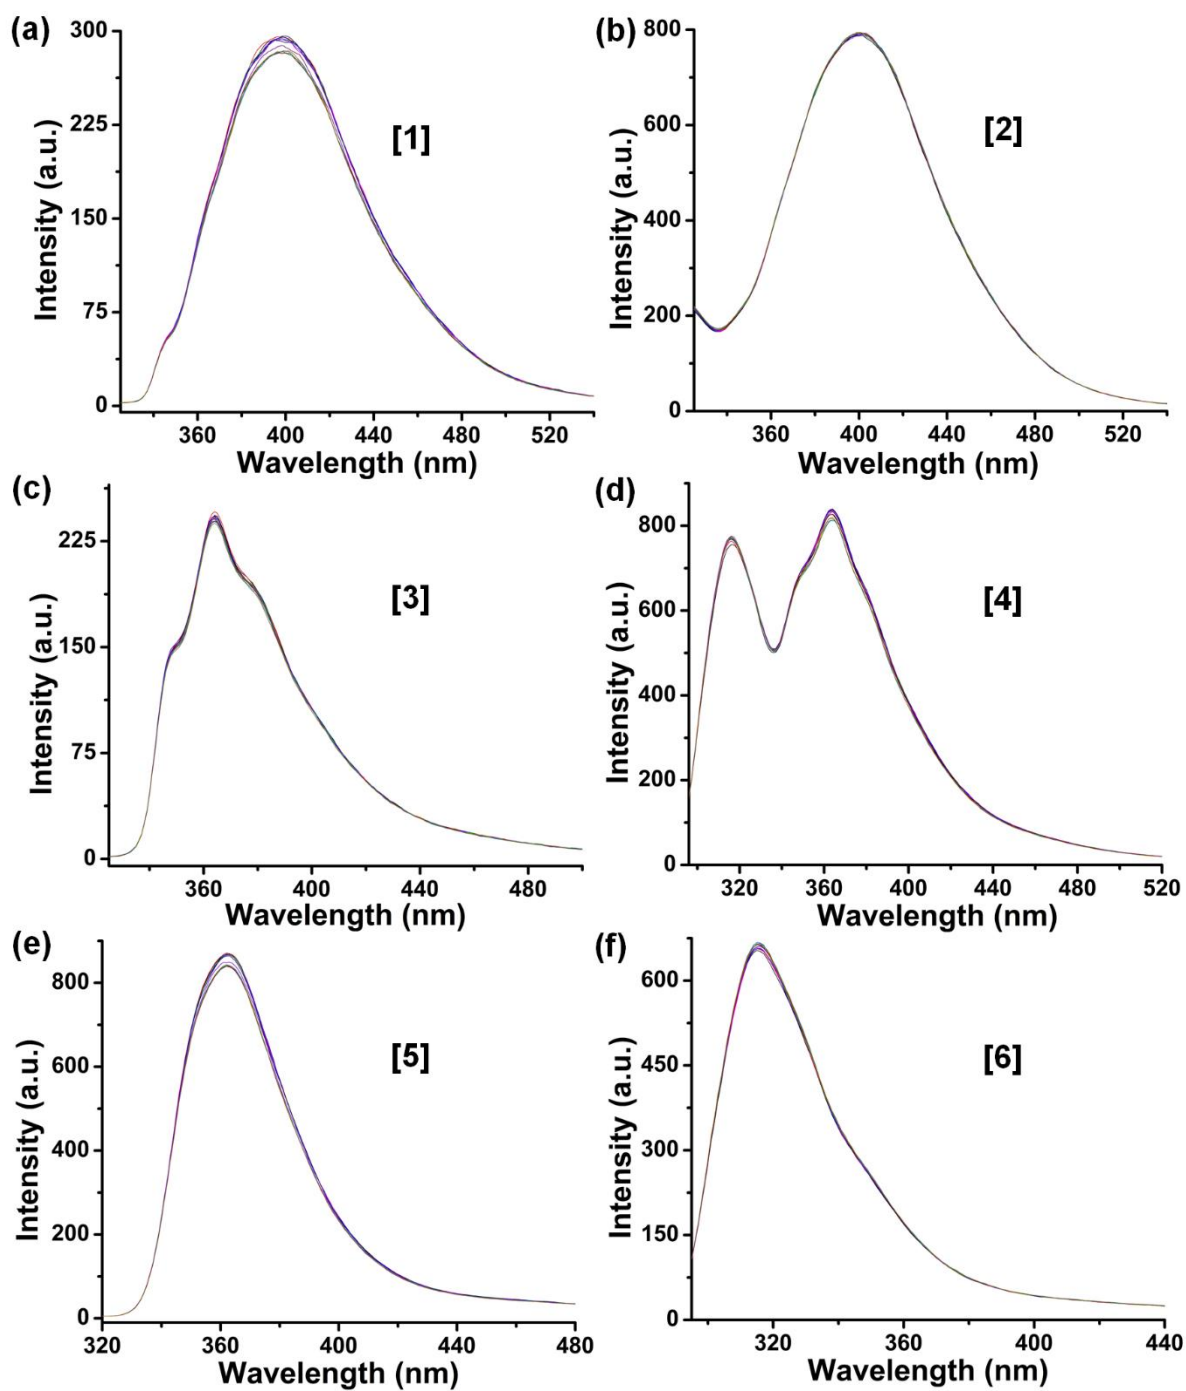

**Fig. S20.** Time-dependent fluorescence monitoring of the complexes **1–6** (20  $\mu$ M) in dark for 0–60 min in DMF.

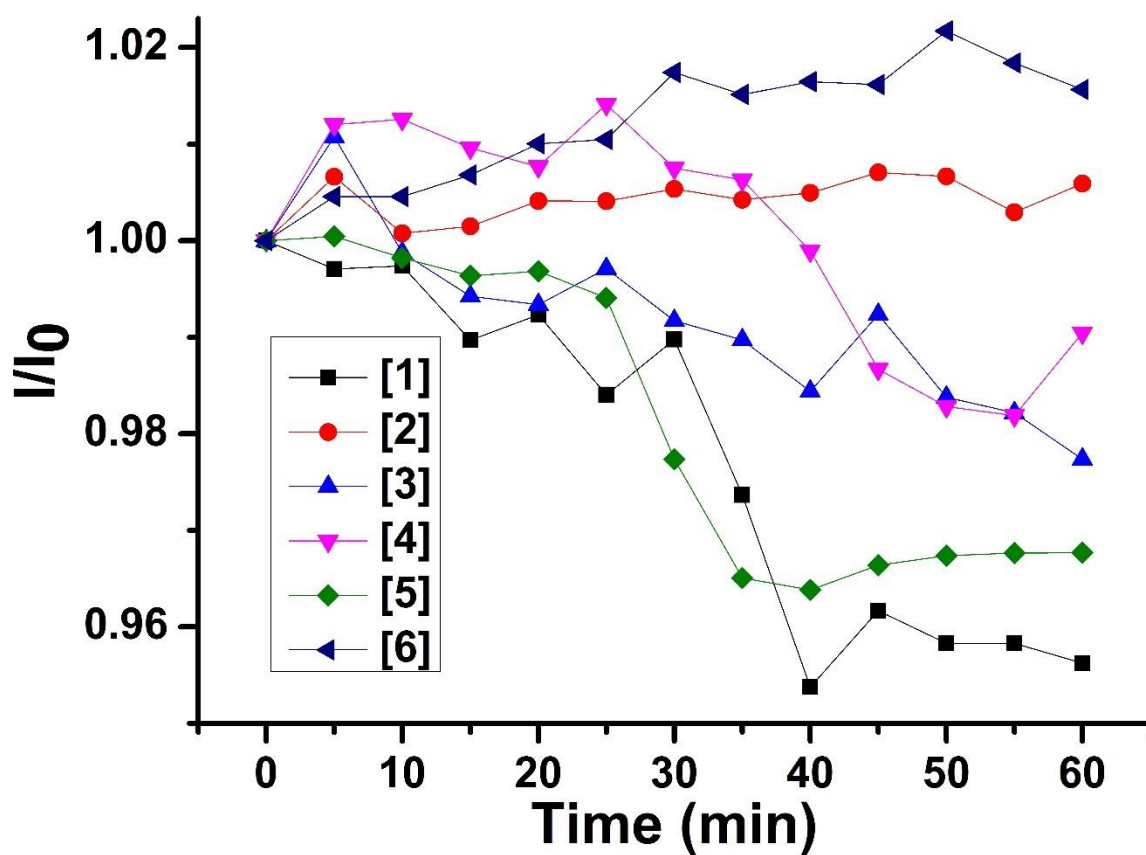

**Fig. S21.** An overlay of relative changes of fluorescence intensity for 0–60 min of the complexes 1–6 (20  $\mu$ M) in DMF studied in the dark.



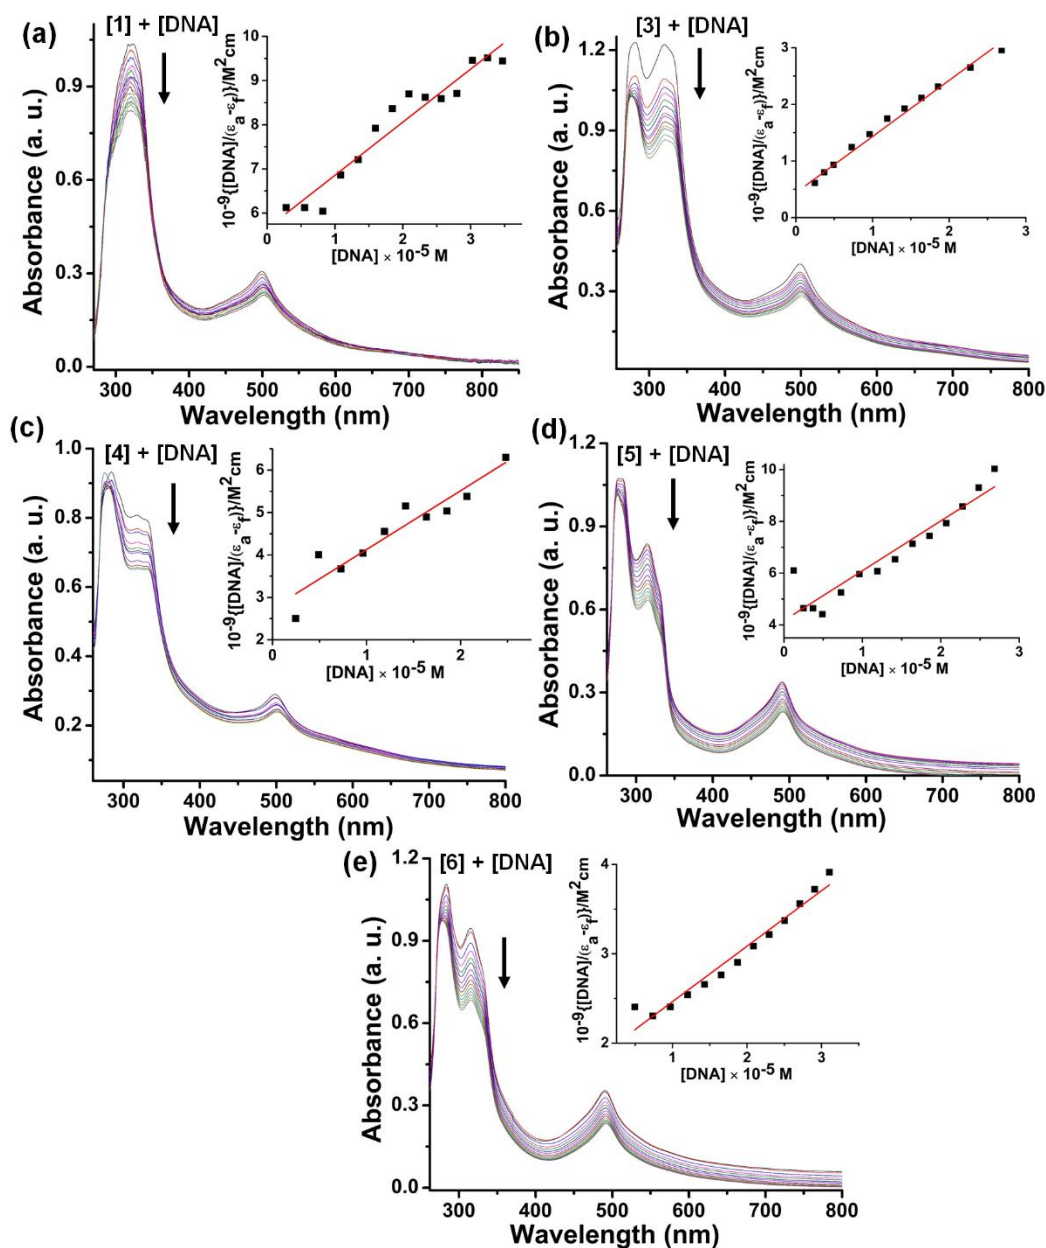

**Fig. S22.** Binding of the complexes with calf thymus (CT)-DNA. The absorption spectral traces of the complex showing hypochromic and bathochromic shifts in 1% (v/v) DMF–5 mM Tris-HCl/NaCl buffer (pH = 7.2). (a) **1** (58  $\mu\text{M}$ ) upon the addition of CT-DNA (0–35  $\mu\text{M}$ ); (b) **3** (39  $\mu\text{M}$ ) upon the addition of CT-DNA (0–27  $\mu\text{M}$ ); (c) **4** (39  $\mu\text{M}$ ) upon the addition of CT-DNA (0–25  $\mu\text{M}$ ); (d) **5** (39  $\mu\text{M}$ ) upon the addition of CT-DNA (0–27  $\mu\text{M}$ ); (e) **6** (20  $\mu\text{M}$ ) upon the addition of CT-DNA (0–31  $\mu\text{M}$ ); Insets: Determination of intrinsic equilibrium binding constant ( $K_b$ ) from slope to intercept ratio of linear fit of the plot.

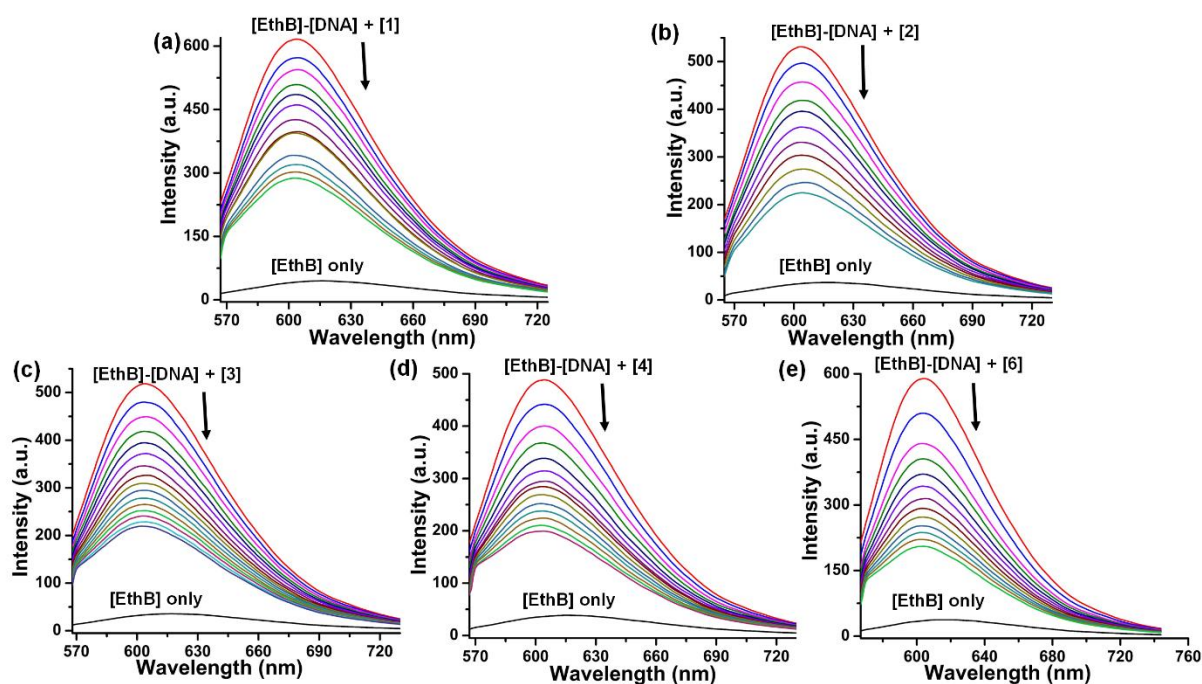

**Fig. S23.** Quenching of fluorescence emission of ethidium bromide (EthB, 12  $\mu\text{M}$ )-CT DNA (14.4  $\mu\text{M}$ ) adduct at  $\sim 604$  nm in 1% (v/v) DMF–5 mM Tris-HCl/NaCl buffer (pH = 7.2) upon addition of (a) Complex 1 (0–22  $\mu\text{M}$ ); (b) Complex 2 (0–19  $\mu\text{M}$ ); (c) Complex 3 (0–28  $\mu\text{M}$ ); (d) Complex 4 (0–22  $\mu\text{M}$ ) and (e) Complex 1 (0–13  $\mu\text{M}$ ) showing displacement of EthB and intercalation with DNA.

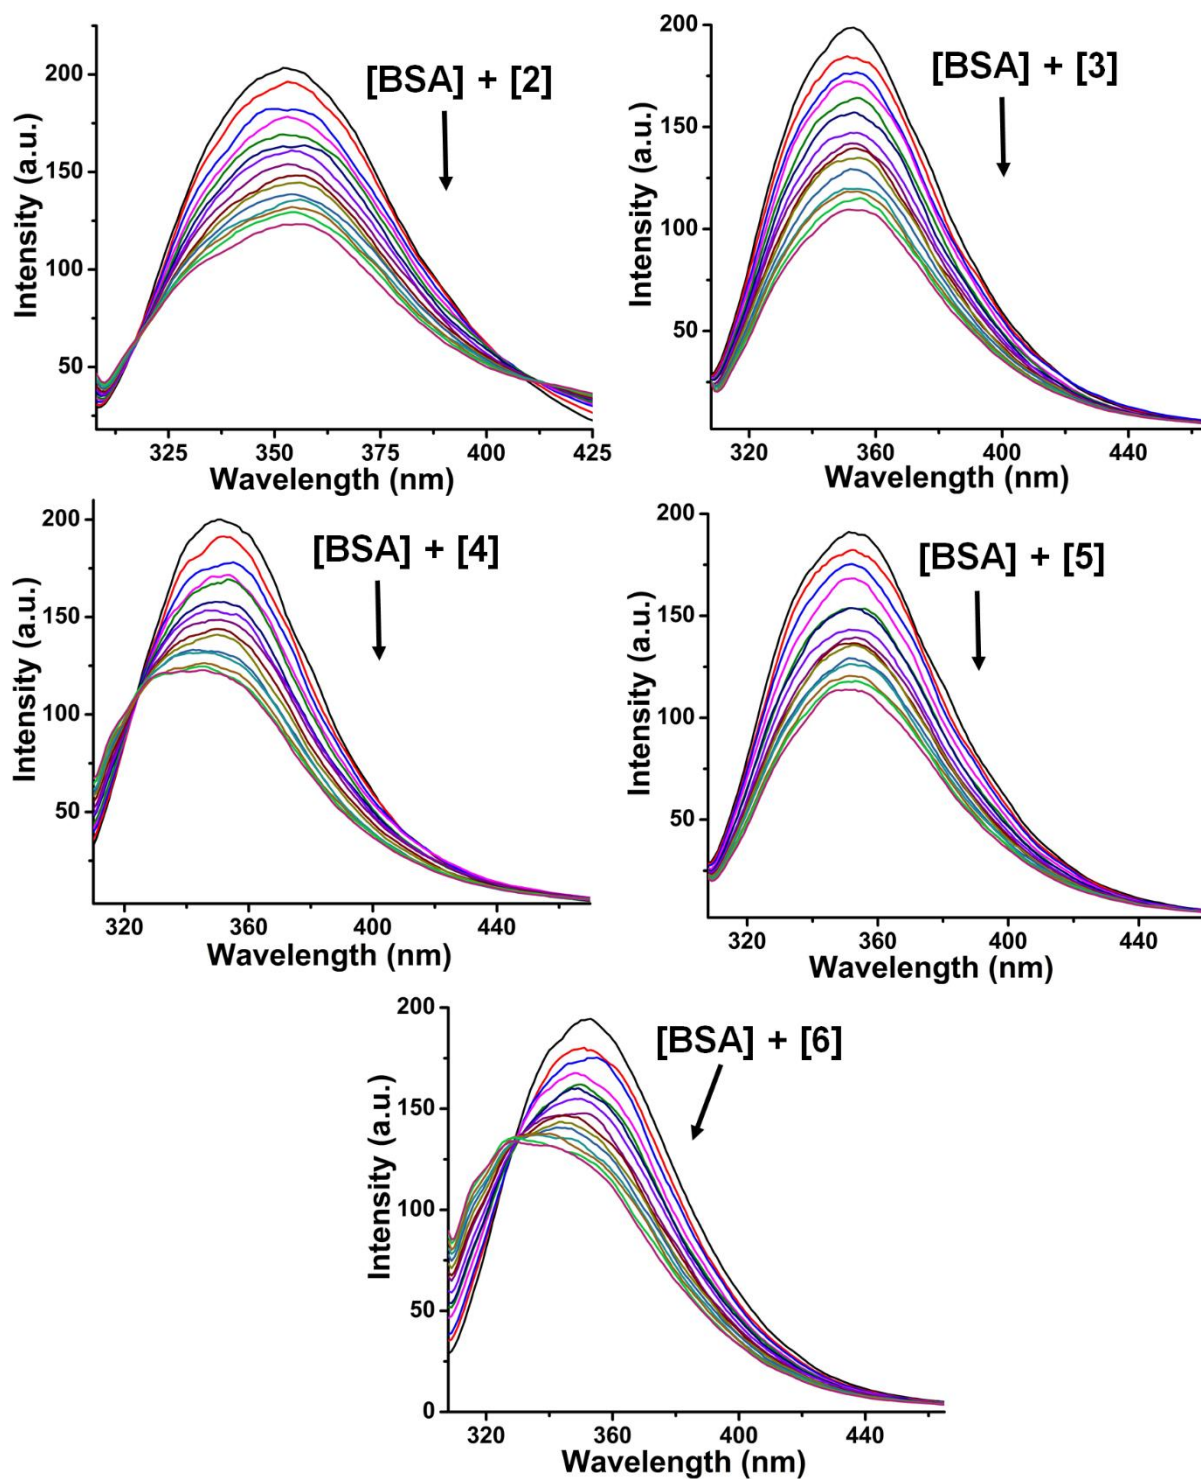

**Fig. S24.** Bovine serum albumin (BSA) binding of the complexes in 0.7% (v/v) DMF–5mM Tris HCl/NaCl (pH = 7.2) buffer. Fluorescence ( $\lambda_{\text{ex}} = 295 \text{ nm}$ ) quenching of the BSA ( $2 \mu\text{M}$ ) in the presence of increasing complexes **2–6** (0– $3.5 \mu\text{M}$ ).

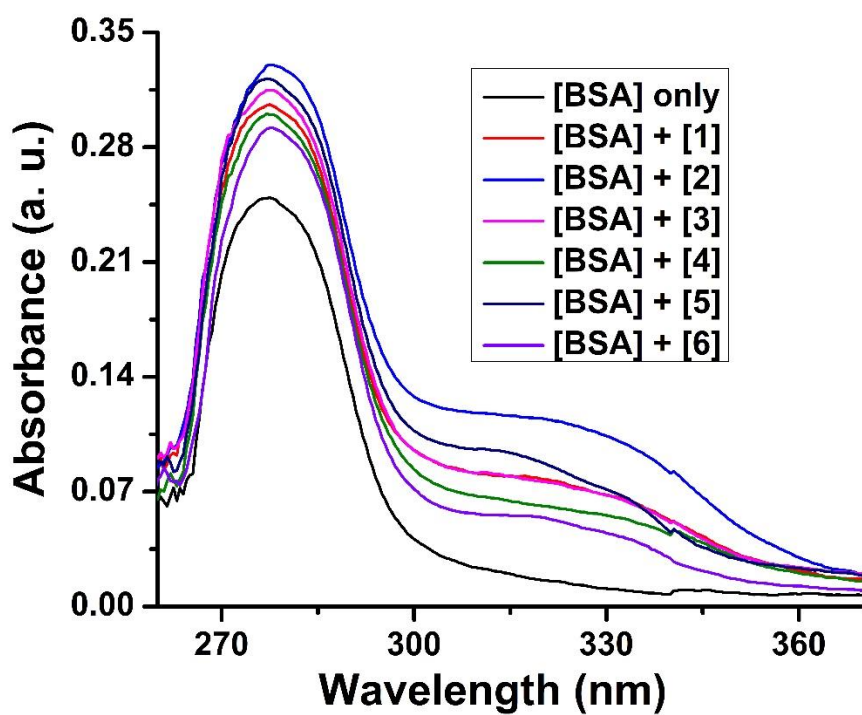

**Fig. S25.** The absorption spectral overlay of bovine serum albumin ( $5 \mu\text{M}$ ) and changes upon addition of complexes 1–6 ( $1.5 \mu\text{M}$ ) in in 0.2% (v/v) DMF-5 mM Tris HCl/NaCl (pH = 7.2) buffer.

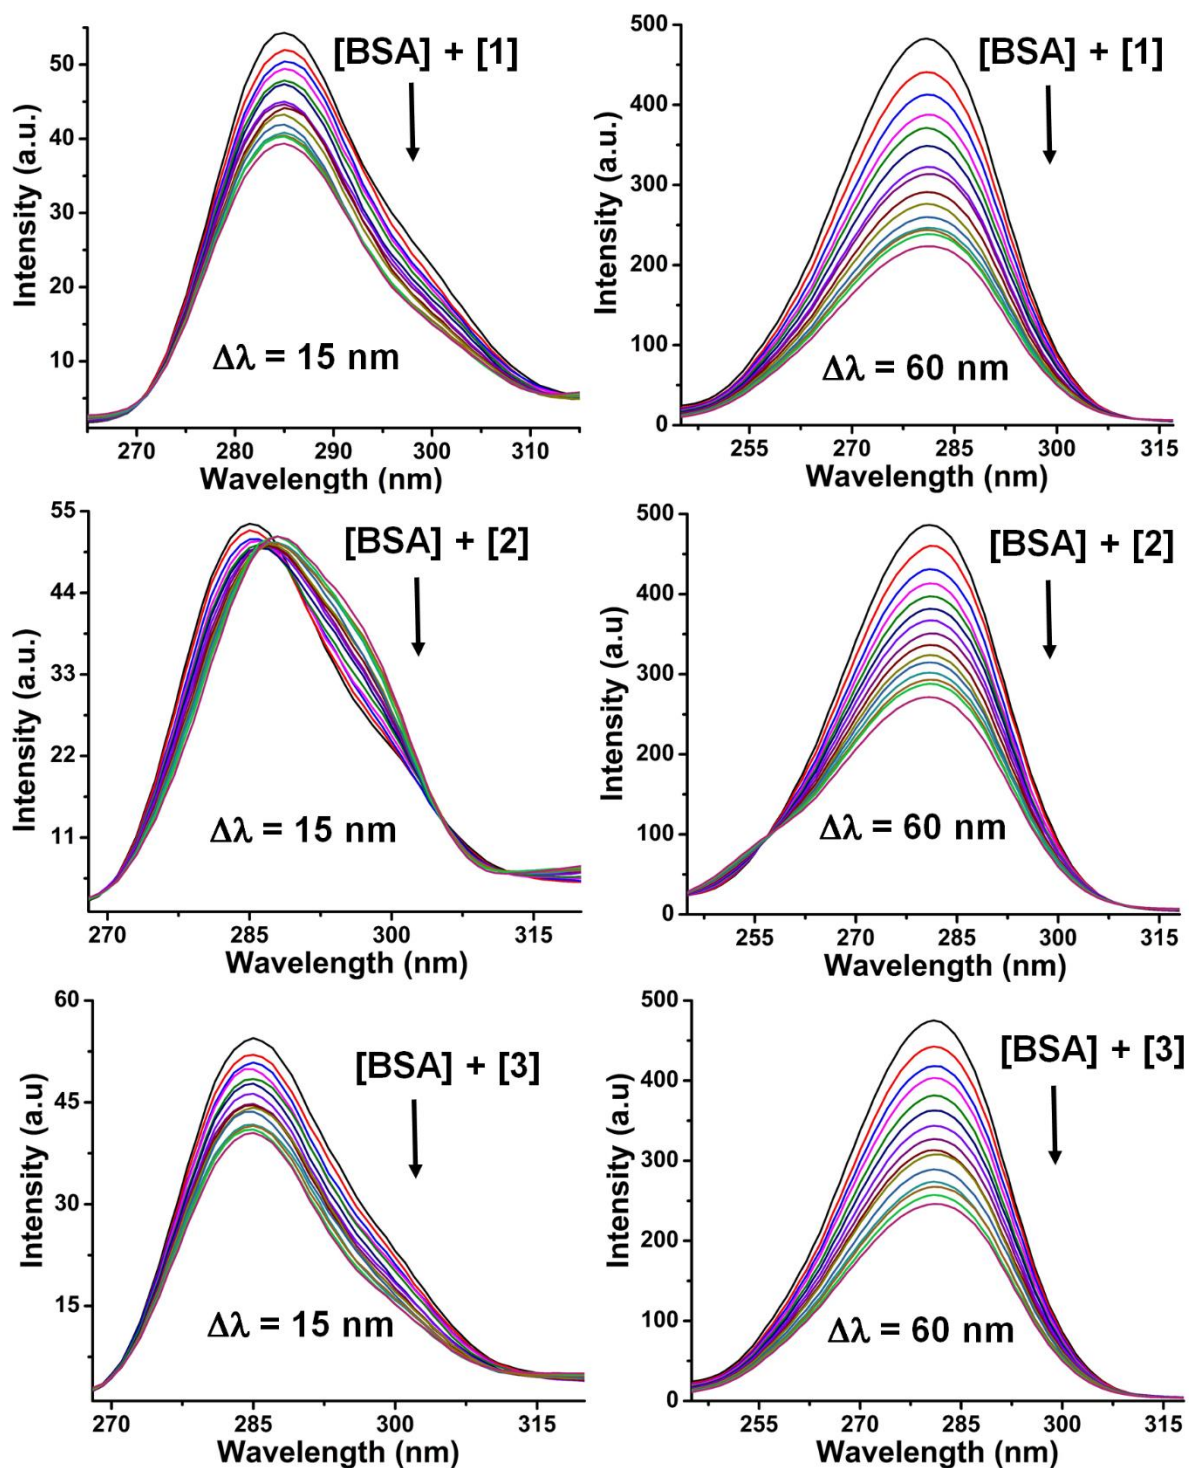

**Fig. S26.** Bovine serum albumin (BSA) binding of the complexes in 0.7% (v/v) DMF–5mM Tris HCl/NaCl (pH = 7.2) buffer. Synchronous fluorescence with  $\Delta\lambda = 15$  nm and  $\Delta\lambda = 60$  nm of the BSA (2  $\mu$ M) in the presence of increasing complexes 1–3 (0–3.5  $\mu$ M).

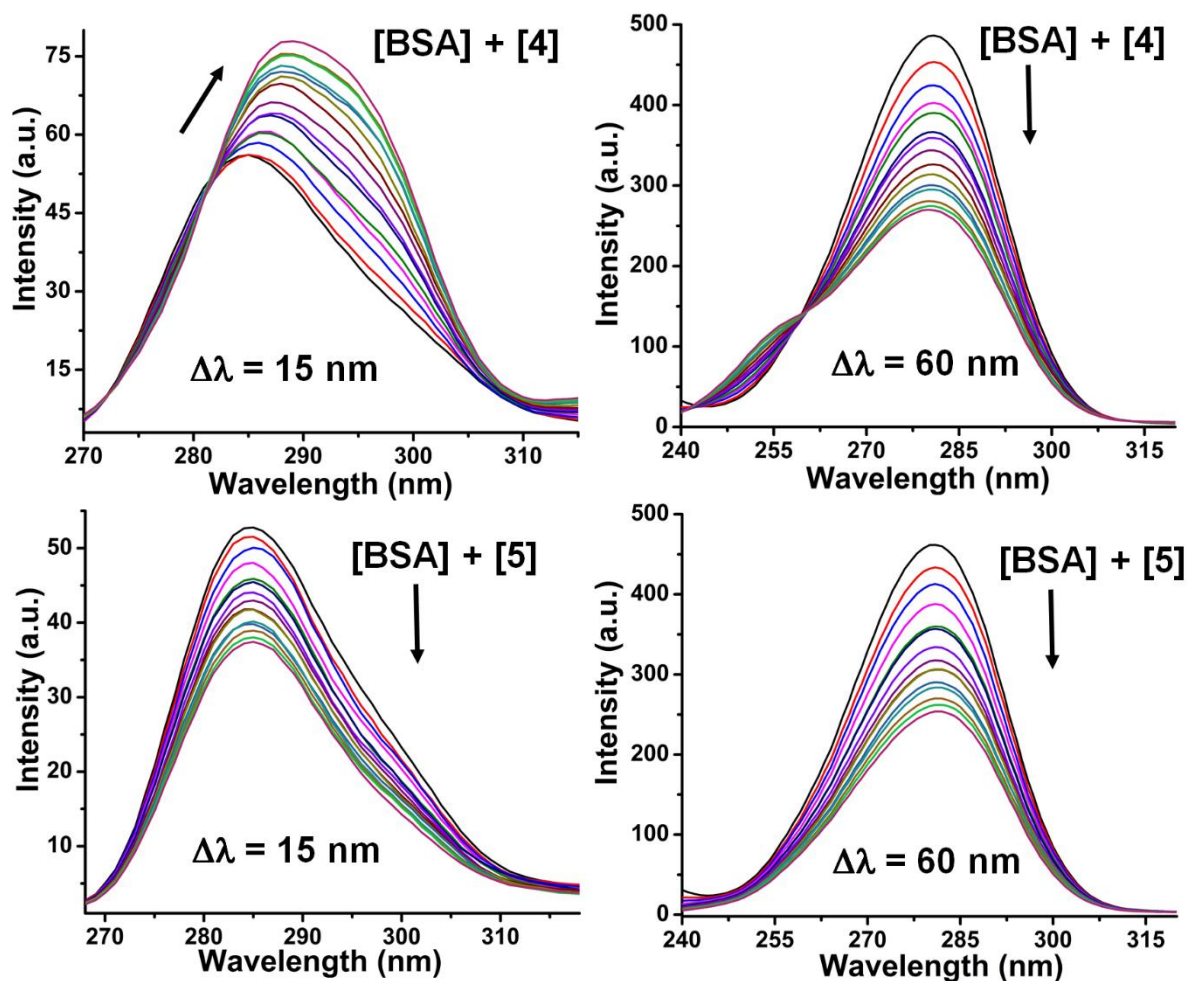

**Fig. S27.** Bovine serum albumin (BSA) binding of the complexes in 0.7% (v/v) DMF–5mM Tris HCl/NaCl (pH = 7.2) buffer. Synchronous fluorescence with  $\Delta\lambda = 15 \text{ nm}$  and  $\Delta\lambda = 60 \text{ nm}$  of the BSA ( $2 \mu\text{M}$ ) in the presence of increasing complexes **4** and **5** ( $0\text{--}3.5 \mu\text{M}$ ).

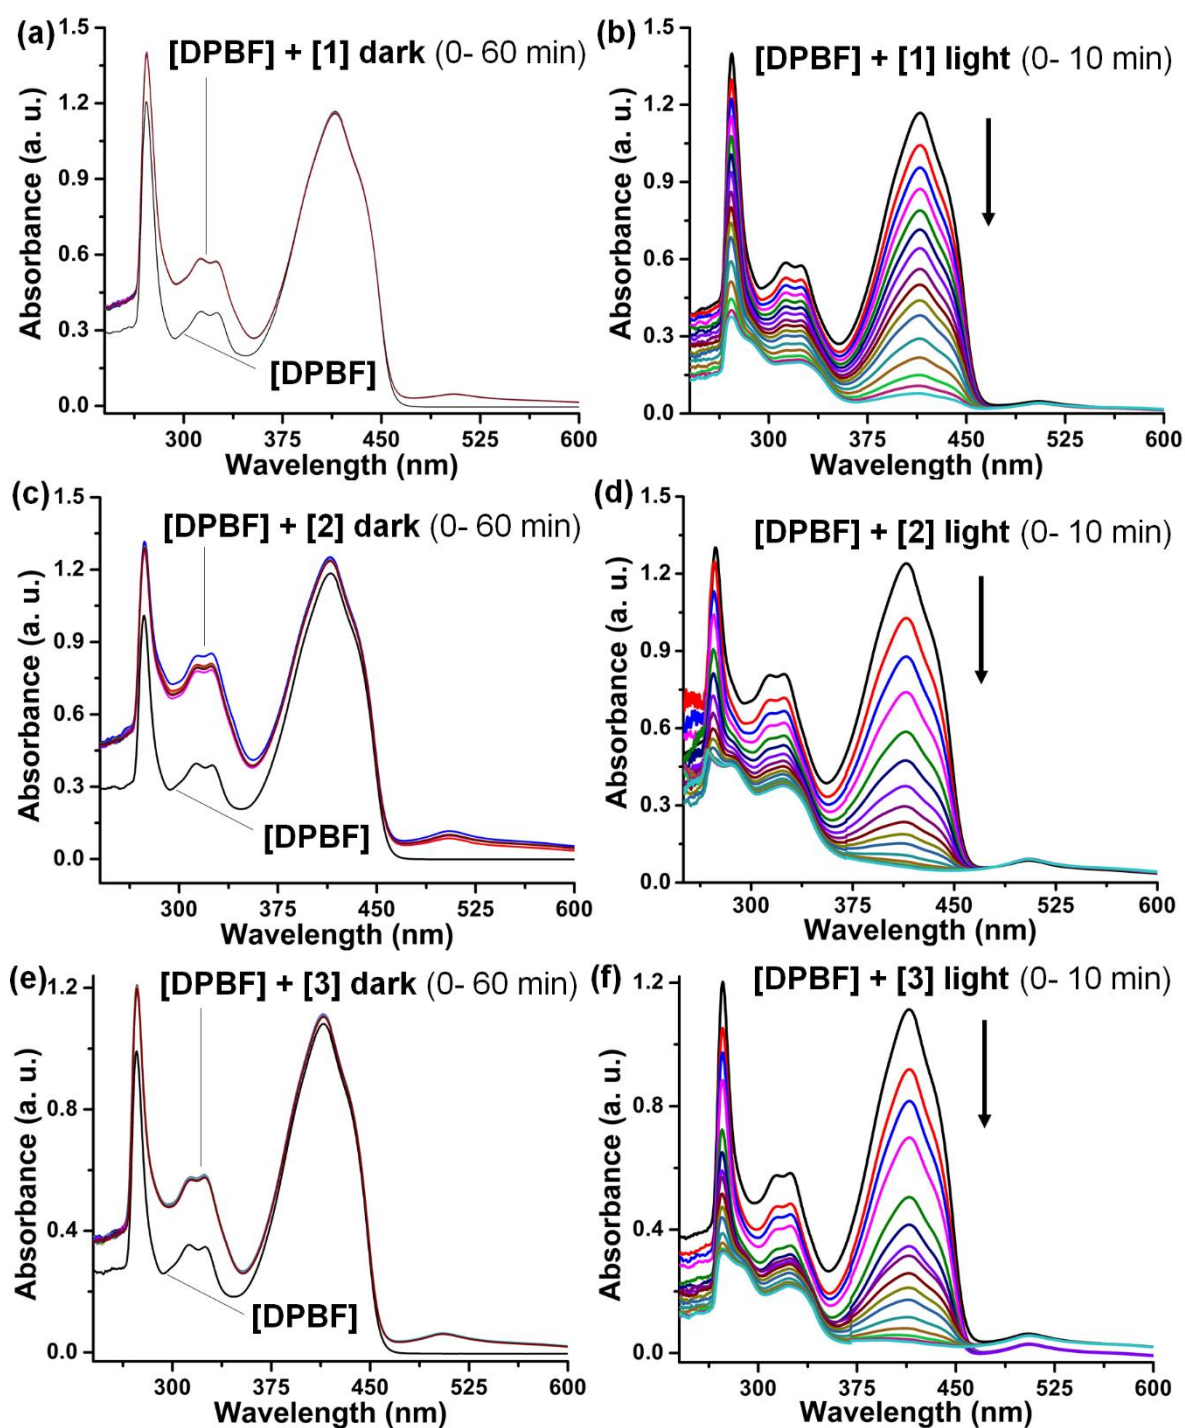

**Fig. S28.** (a), (c) and (e) absorption spectral profile of mixture of DPBF (50  $\mu\text{M}$ ) and complexes 1, 2, and 3 (10  $\mu\text{M}$ ) respectively in the dark for 0–60 mins. (b), (d) and (f) green light ( $\lambda_{\text{ex}} = 530 \text{ nm}$ ) induced absorption spectral changes of mixture of DPBF (50  $\mu\text{M}$ ) and complexes 1, 2 and 3 (10  $\mu\text{M}$ ) for 0–10 mins.

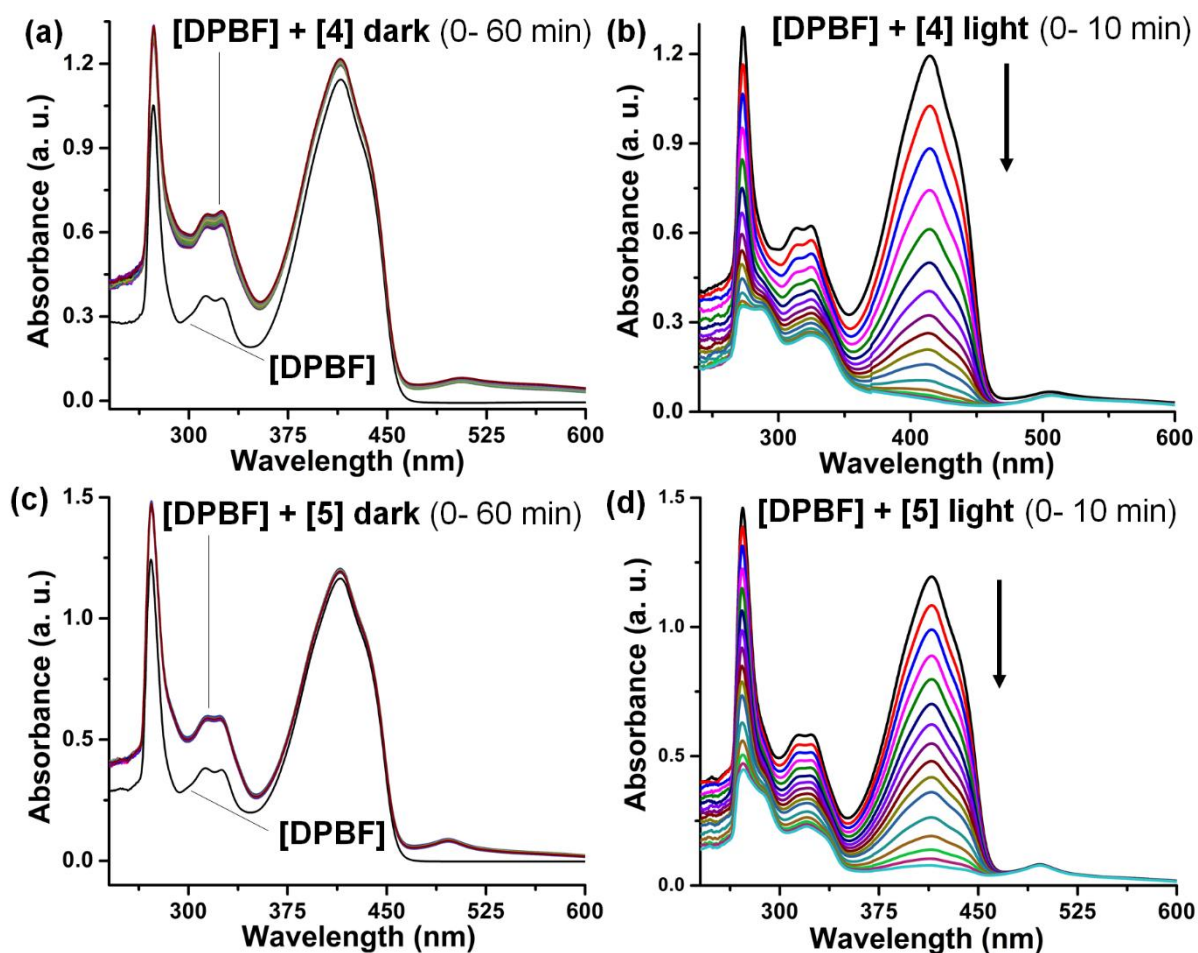

**Fig. S29.** (a) and (c) absorption spectral profile of mixture of DPBF (50 μM) and complexes **4** and **5** (10 μM) respectively in the dark for 0–60 mins. (b) and (d) green light ( $\lambda_{\text{ex}} = 530 \text{ nm}$ ) induced absorption spectral changes of mixture of DPBF (50 μM) and complexes **4** and **5** (10 μM) for 0–10 mins.



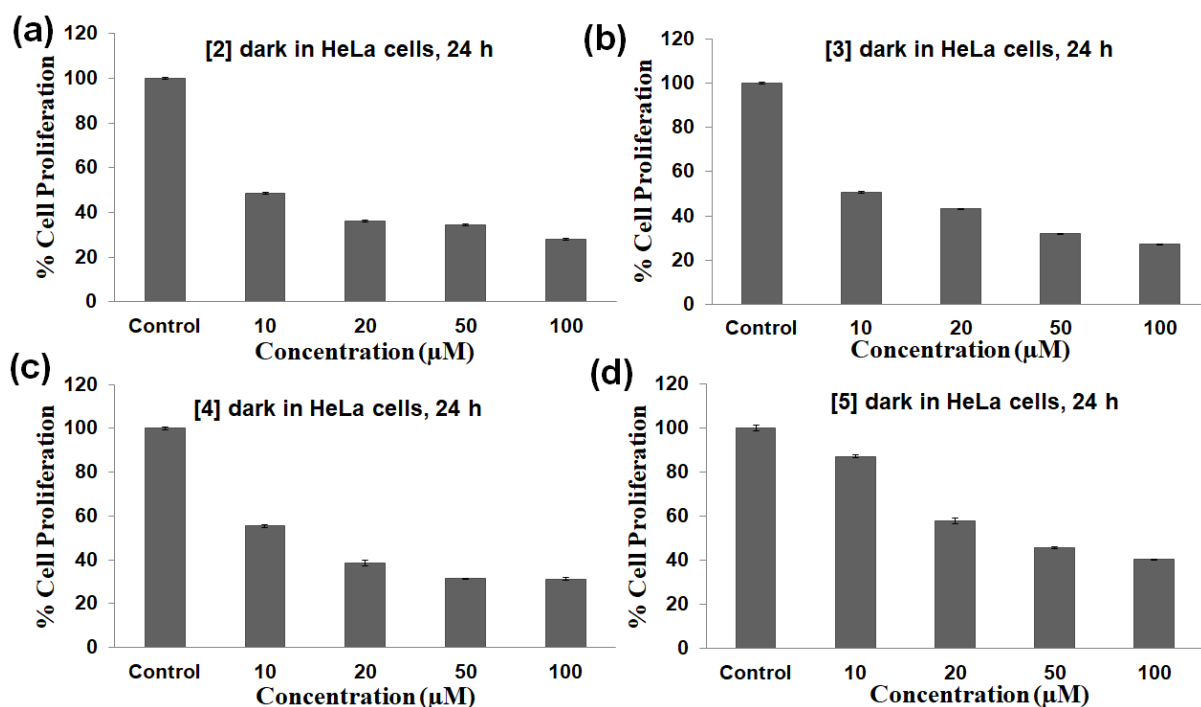

**Fig. S30.** Dose-dependent cytotoxicity of the complexes 2–5 in the dark after 24h incubation in HeLa cells determined from MTT assay.

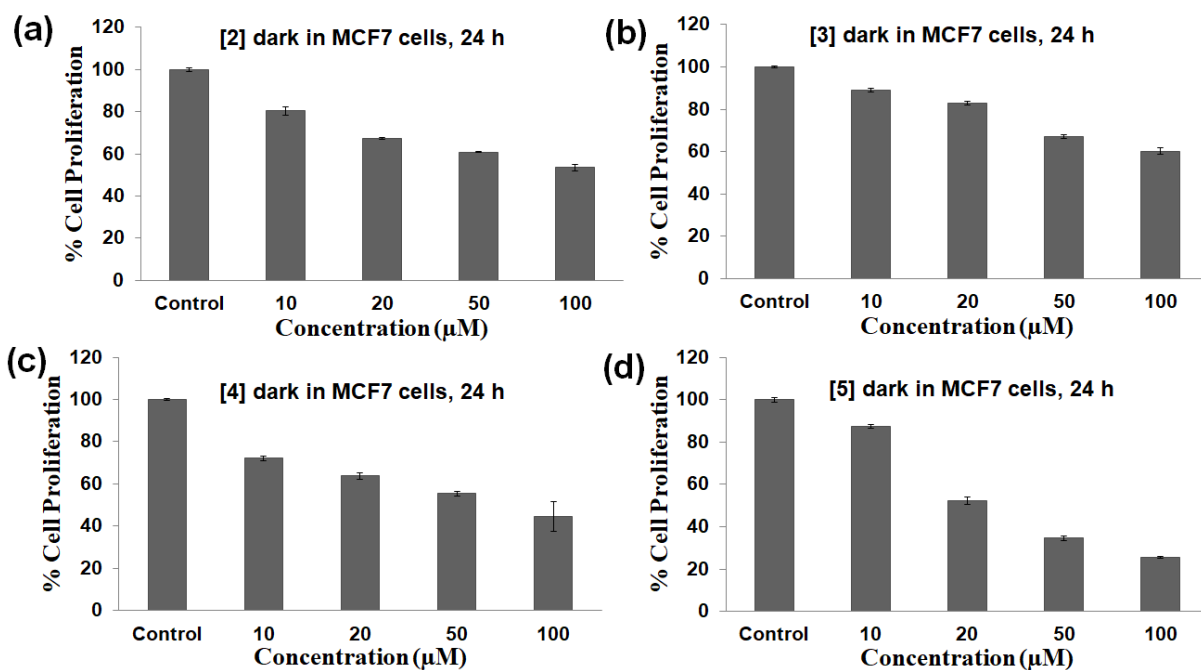

**Fig. S31.** Dose-dependent cytotoxicity of the complexes 2–5 in dark after 24 h incubation in MCF7 cells determined from MTT assay.

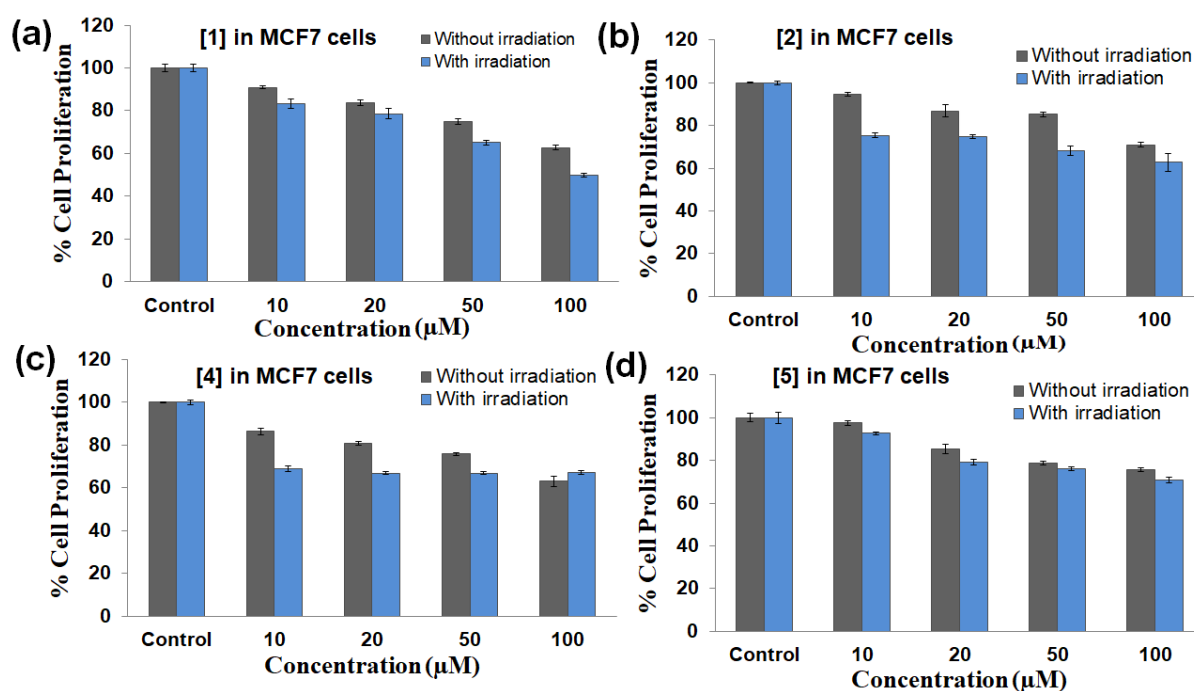

**Fig. S32.** Dose-dependent cytotoxicity of the complexes **1**, **2**, **4**, and **5** in the dark and upon irradiation with low energy UV-A light of 365 nm in MCF7 cells determined from MTT assay. Incubation time with complexes = 4 h and irradiation time = 1 h.

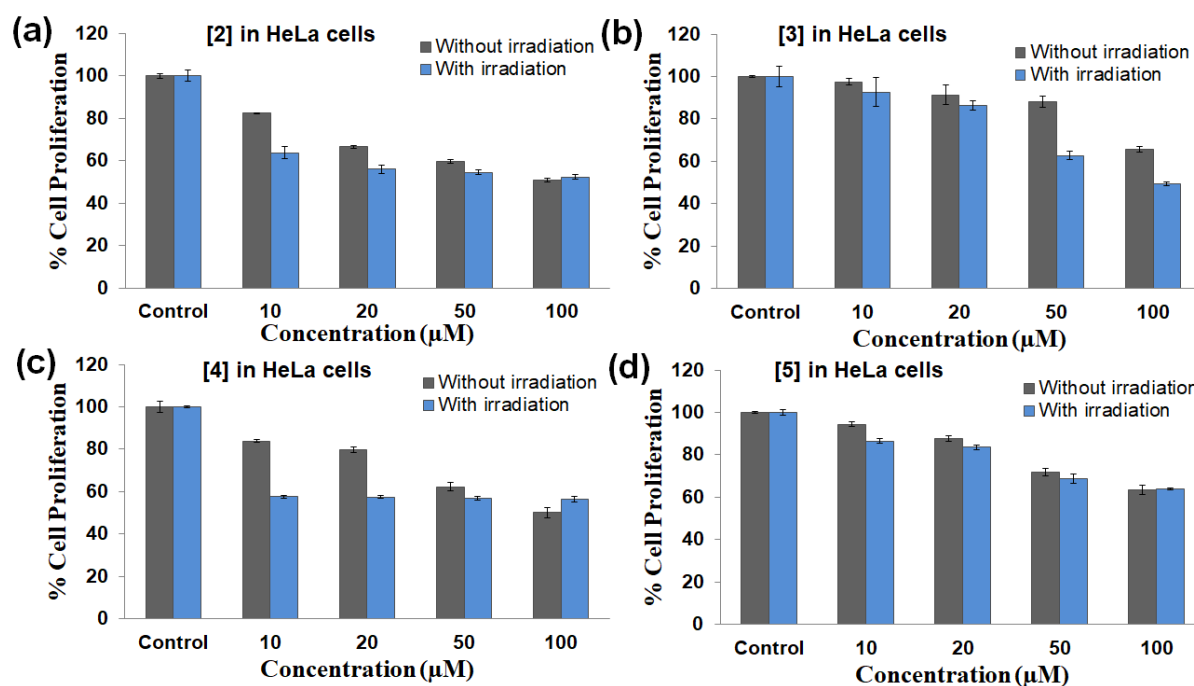

**Fig. S33.** Dose-dependent cytotoxicity of the complexes **2–5** in the dark and upon irradiation with low energy UV-A light of 365 nm in HeLa cells determined from MTT assay. Incubation time with complexes = 4 h and irradiation time = 1 h.

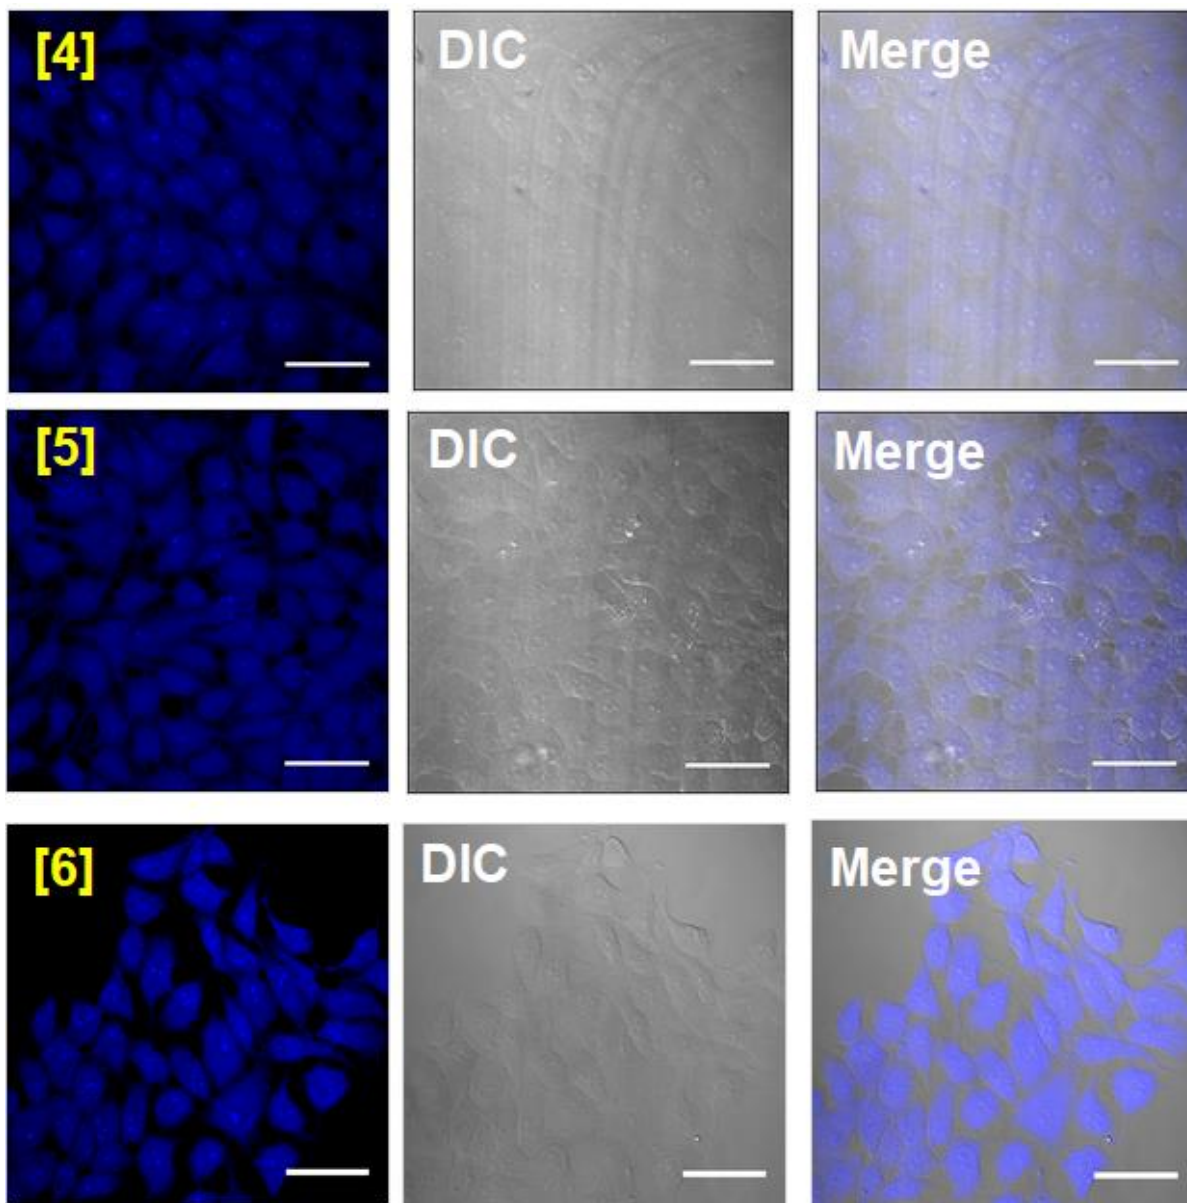

**Fig. S34.** CLSM images demonstrating uptake of the complexes **4**, **5**, and **6** ( $10\ \mu\text{M}$ ) in MCF7 cells after 4h incubation. The excitation and emission wavelengths of complexes were 350 nm and 460 nm, respectively. Scale bar-50  $\mu\text{m}$ .

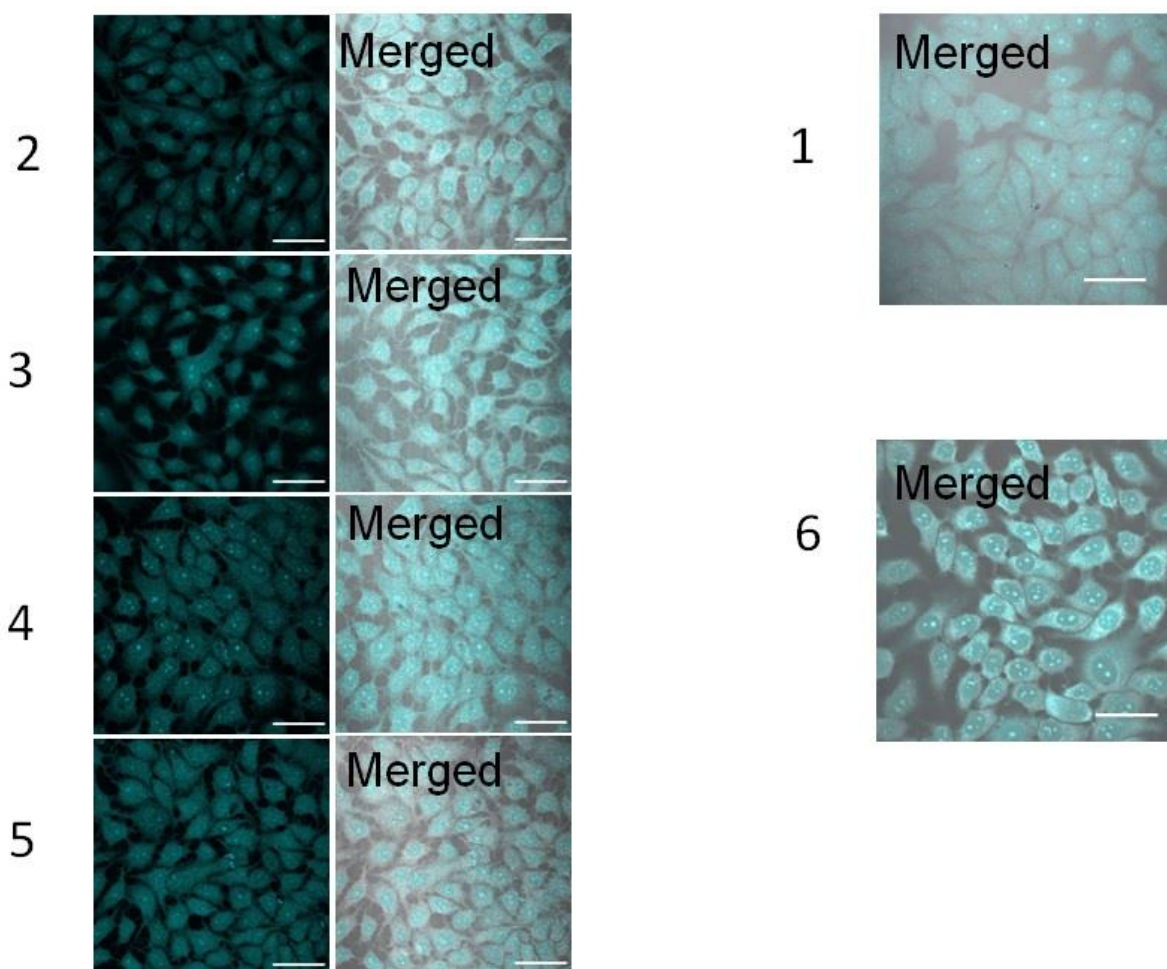

**Fig. S35.** The confocal laser scanning microscopic (CLSM) images demonstrating uptake of the complexes **1–6** ( $10\ \mu\text{M}$ ) in MCF7 cells after 4h incubation. The excitation and emission wavelengths are 350 nm and 460 nm, respectively, cyan pseudo color was given to incorporate better contrast. Scale bar- $50\ \mu\text{m}$ .

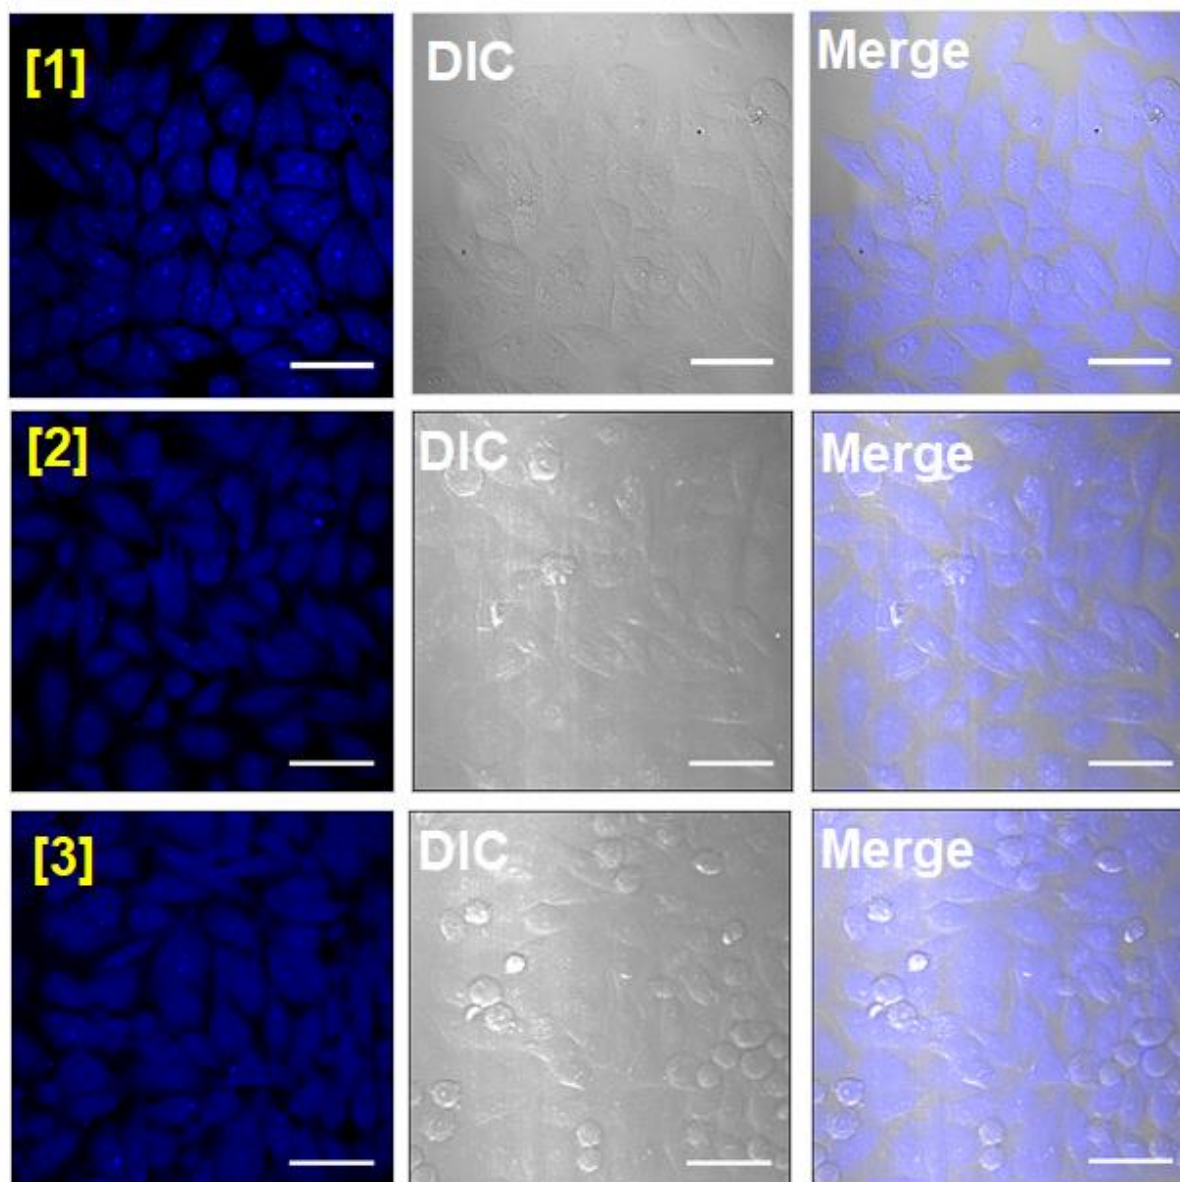

**Fig. S36.** CLSM images demonstrating uptake of the complexes **1–3** ( $10\ \mu\text{M}$ ) in HeLa cells after 4h incubation. The excitation and emission wavelengths of complexes were 350 nm and 460 nm, respectively. Scale bar- 50  $\mu\text{m}$ .

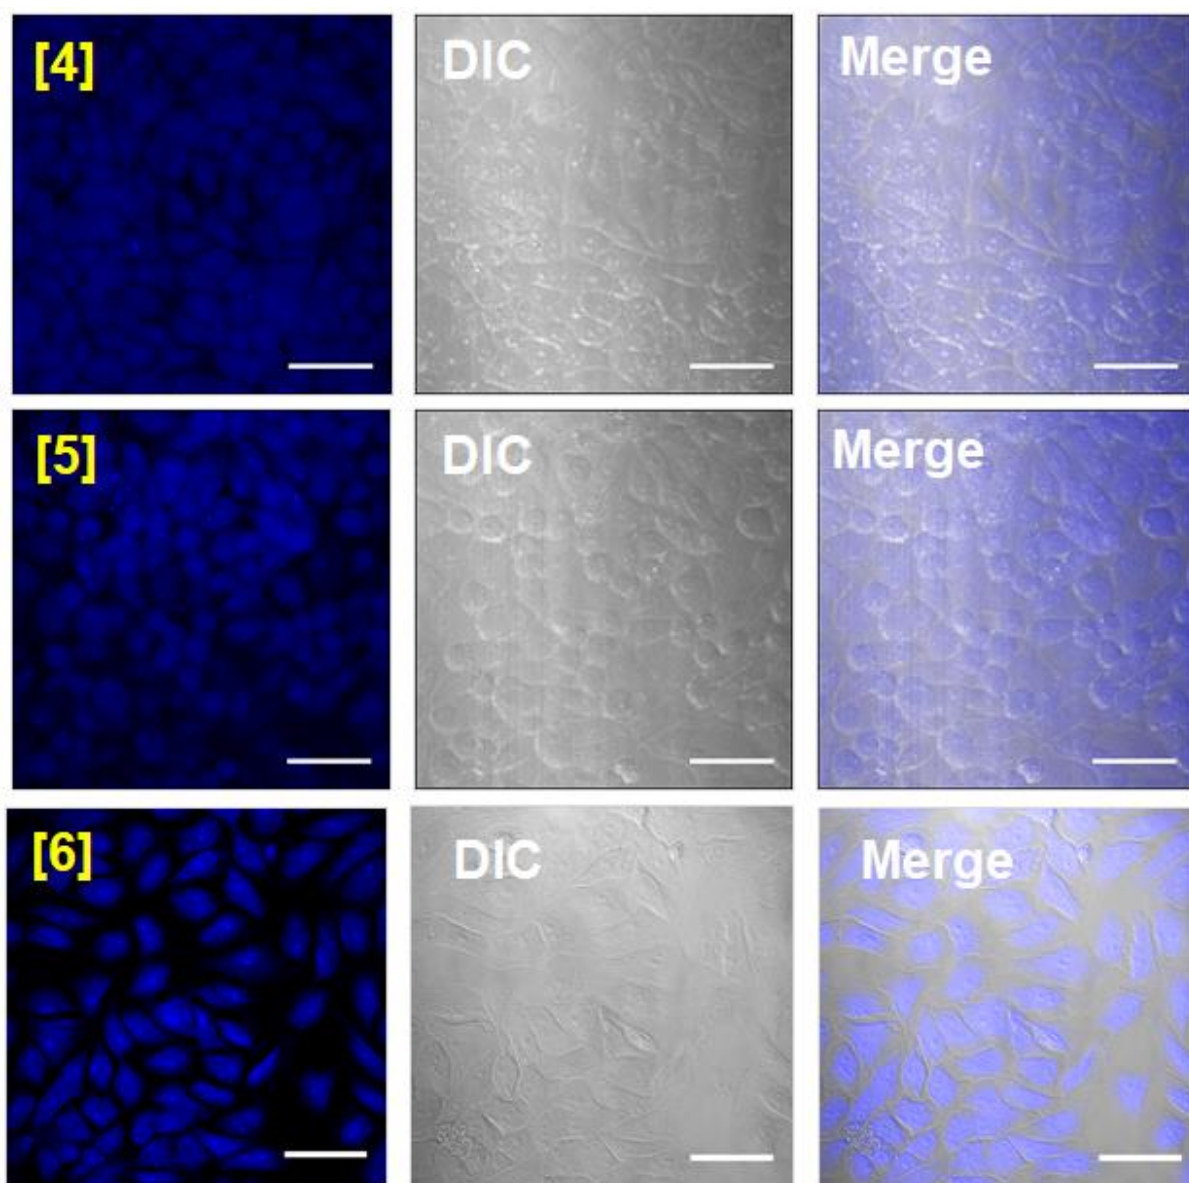

**Fig. S37.** CLSM images demonstrating uptake of the complexes **4–6** ( $10\ \mu\text{M}$ ) in HeLa cells after incubation 4h. The excitation and emission wavelengths of complexes were 350 nm and 460 nm, respectively. Scale bar- 50  $\mu\text{m}$ .

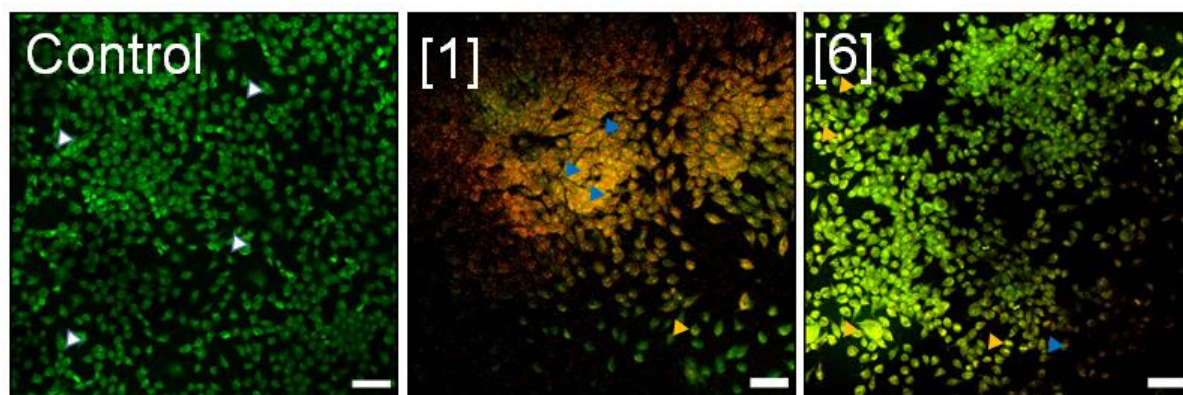

**Fig. S38.** Cell apoptosis detection by acridine orange (AO) and ethidium bromide (EthB) (100  $\mu\text{g}/\text{mL}$ ) dual staining in MCF7 cell lines incubated with complexes **1** and **6** (10  $\mu\text{M}$ ) for 24 h. Untreated breast cancer cells stained in green homogenously demonstrate normal morphology (white arrow), early apoptosis is observed in yellow as chromatin condensation (yellow arrow), and late apoptosis is observed as yellow/orange color with characteristic nuclear fragmentation and blebbing (blue arrow). Scale bar-100  $\mu\text{m}$ .
